# Supplementary material for: A binuclear trimethylenemethane cobalt carbonyl providing the first example of a low-energy perpendicular structure with acyclic hydrocarbon ligands
Source: Royal Society of Chemistry journal article supplement (doi:10.1039/c4nj00685b), 2014-01-01
Supplement: c4nj00685b1.pdf [file c4nj00685b1.pdf]

# A Binuclear Trimethylenemethane Cobalt Carbonyl Providing the First Example of a Low-Energy Perpendicular Structure with Acyclic Hydrocarbon Ligands

Yi Zeng,<sup>a</sup> Hao Feng,<sup>a\*</sup> Yaoming Xie,<sup>b</sup> and  
R. Bruce King<sup>b\*</sup>

<sup>a</sup> *Research Center for Advanced Computation, School of Physics and Chemistry,  
Xihua University, Chengdu, China 610039*

<sup>b</sup> *Department of Chemistry and Center for Computational Chemistry  
University of Georgia, Athens, Georgia 30602, USA*

[rbking@chem.uga.edu](mailto:rbking@chem.uga.edu); [fenghao@mail.xhu.edu.cn](mailto:fenghao@mail.xhu.edu.cn)

## Supporting Information

Tables S1 to S4: Co-Co distances (Å), total energies (E, in hartree), relative energies ( $\Delta E$ , in kcal/mol) and spin expectation values  $\langle S^2 \rangle$  for all structures by the four DFT methods.

Tables S5 to S16: Atomic coordinates of the optimized structures for the all structures;

Tables S17 to S28: Harmonic vibrational frequencies (in  $\text{cm}^{-1}$ ) and infrared intensities (in parentheses in  $\text{km/mol}$ ) for all structures.

**Table S1.** Co-Co distances (Å), total energies (E, in hartree), relative energies ( $\Delta E$ , in kcal/mol) and spin expectation values  $\langle S^2 \rangle$  for the  $(C_4H_6)_2Co_2(CO)_2$  structures by the M06-L, B3LYP\*, B3LYP and BP86 methods. None of these structures has an imaginary vibrational frequency.

|        |                       | <b>2S-1, <math>C_{2v}</math></b> | <b>2T-2, <math>C_i</math></b> | <b>2S-3, <math>C_{2v}</math></b> | <b>2T-4, <math>C_{2v}</math></b> |
|--------|-----------------------|----------------------------------|-------------------------------|----------------------------------|----------------------------------|
| M06-L  | M-M                   | 2.29                             | 2.779                         | 2.231                            | 2.331                            |
|        | E                     | -3304.24963                      | -3304.22953                   | -3304.21887                      | -3304.21207                      |
|        | $\Delta E$            | 0.0                              | 12.6                          | 19.3                             | 23.6                             |
|        | $\langle S^2 \rangle$ | 0.00                             | 2.08                          | 0.00                             | 2.08                             |
| B3LYP* | M-M                   | 2.300                            | 3.019                         | 2.231                            | 2.349                            |
|        | E                     | -3303.75108                      | -3303.74460                   | -3303.71603                      | -3303.71145                      |
|        | $\Delta E$            | 0.0                              | 4.1                           | 22.0                             | 24.9                             |
|        | $\langle S^2 \rangle$ | 0.00                             | 2.05                          | 0.00                             | 2.11                             |
| B3LYP  | M-M                   | 2.292                            | 3.064                         | 2.232                            | 2.349                            |
|        | E                     | -3304.40861                      | -3304.41592                   | -3304.36920                      | -3304.36932                      |
|        | $\Delta E$            | 0.0                              | -4.6                          | 24.7                             | 24.7                             |
|        | $\langle S^2 \rangle$ | 0.00                             | 2.07                          | 0.00                             | 2.27                             |
| BP86   | M-M                   | 2.322                            | 2.668                         | 2.235                            | 2.340                            |
|        | E                     | -3304.89791                      | -3304.85823                   | -3304.87590                      | -3304.86448                      |
|        | $\Delta E$            | 0.0                              | 24.9                          | 13.8                             | 21.0                             |
|        | $\langle S^2 \rangle$ | 0.00                             | 2.02                          | 0.00                             | 2.02                             |

**Table S2.** Co-Co distances (Å), total energies (E, in hartree), relative energies ( $\Delta E$ , in kcal/mol) and spin expectation values  $\langle S^2 \rangle$  for the  $(C_4H_6)_2Co_2(CO)_3$  structures by the M06-L, B3LYP\*, B3LYP and BP86 methods. None of these structures has an imaginary vibrational frequency.

|        |                       | <b>3S-1, <math>C_s</math></b> | <b>3S-2, <math>C_s</math></b> | <b>3T-3, <math>D_{3h}</math></b> |
|--------|-----------------------|-------------------------------|-------------------------------|----------------------------------|
| M06-L  | M-M                   | 2.419                         | 2.408                         | 2.231                            |
|        | E                     | -3417.59568                   | -3417.59338                   | -3417.59038                      |
|        | $\Delta E$            | 0.0                           | 1.4                           | 3.3                              |
|        | $\langle S^2 \rangle$ | 0.00                          | 0.00                          | 2.01                             |
| B3LYP* | M-M                   | 2.472                         | 2.424                         | 2.245                            |
|        | E                     | -3417.04209                   | -3417.03919                   | -3417.03053                      |
|        | $\Delta E$            | 0.0                           | 1.8                           | 7.3                              |
|        | $\langle S^2 \rangle$ | 0.00                          | 0.00                          | 2.02                             |
| B3LYP  | M-M                   | 2.487                         | 2.437                         | 2.252                            |
|        | E                     | -3417.75986                   | -3417.75430                   | -3417.74577                      |
|        | $\Delta E$            | 0.0                           | 3.5                           | 8.8                              |
|        | $\langle S^2 \rangle$ | 0.00                          | 0.00                          | 2.02                             |
| BP86   | M-M                   | 2.423                         | 2.393                         | 2.229                            |
|        | E                     | -3418.25745                   | -3418.26200                   | -3418.25569                      |
|        | $\Delta E$            | 0.0                           | 2.393                         | 2.229                            |

|                       |      |      |      |
|-----------------------|------|------|------|
| $\langle S^2 \rangle$ | 0.00 | 0.00 | 2.00 |
|-----------------------|------|------|------|

**Table S3.** Co-Co distances (Å), total energies (E, in hartree), relative energies ( $\Delta E$ , in kcal/mol) for the  $(C_4H_6)_2Co_2(CO)_4$  structures by the M06-L, B3LYP\*, B3LYP and BP86 methods. None of these structures has an imaginary vibrational frequency.

|        |            | 4S-1, $C_{2h}$ | 4S-2, $C_{2v}$ | 4S-3, $C_2$ |
|--------|------------|----------------|----------------|-------------|
| M06-L  | M-M        | 2.504          | 2.507          | 2.678       |
|        | E          | -3530.97710    | -3530.97651    | -3530.97440 |
|        | $\Delta E$ | 0.0            | 0.4            | 1.7         |
| B3LYP* | M-M        | 2.536          | 2.539          | 2.721       |
|        | E          | -3530.36556    | -3530.36412    | -3530.36430 |
|        | $\Delta E$ | 0.0            | 0.9            | 0.8         |
| B3LYP  | M-M        | 2.544          | 2.548          | 2.723       |
|        | E          | -3531.14066    | -3531.13917    | -3531.14189 |
|        | $\Delta E$ | 0.0            | 0.9            | -0.8        |
| BP86   | M-M        | 2.514          | 2.516          | 2.712       |
|        | E          | -3531.65758    | -3531.65602    | -3531.64828 |
|        | $\Delta E$ | 0.0            | 1.0            | 5.8         |

**Table S4.** Co-Co distances (Å), total energies (E, in hartree) for the  $(C_4H_6)_2Co_2(CO)_6$  and  $(C_4H_6)_2Co_2(CO)_5$  structures by the M06-L, B3LYP\*, B3LYP and BP86 methods. None of these structures has an imaginary vibrational frequency.

|        |     | 5S, $C_1$   | 6S, $C_2$   |
|--------|-----|-------------|-------------|
| M06-L  | M-M | 2.698       | 2.770       |
|        | E   | -3644.28907 | -3757.59869 |
| B3LYP* | M-M | 2.764       | 2.826       |
|        | E   | -3643.63102 | -3756.89359 |
| B3LYP  | M-M | 2.782       | 2.824       |
|        | E   | -3644.46912 | -3757.79356 |
| BP86   | M-M | 2.612       | 2.831       |
|        | E   | -3644.98436 | -3758.30885 |

**Table S5.** Optimized coordinates of the 2S-1 structure

|    | M06-L     |           |           | B3LYP*    |           |           | B3LYP     |           |           | BP86      |           |           |
|----|-----------|-----------|-----------|-----------|-----------|-----------|-----------|-----------|-----------|-----------|-----------|-----------|
|    | x         | y         | z         | x         | y         | z         | x         | y         | z         | x         | y         | z         |
| 6  | -1.767842 | 0.000000  | -0.878038 | -1.836502 | 0.000000  | -0.893523 | -1.842777 | 0.000000  | -0.895351 | -1.800106 | 0.000000  | -0.894737 |
| 1  | -2.004774 | 0.913710  | -1.420710 | -2.079881 | 0.915859  | -1.434191 | -2.091056 | 0.913544  | -1.433577 | -2.026579 | 0.923456  | -1.445145 |
| 1  | -2.004774 | -0.913710 | -1.420710 | -2.079881 | -0.915859 | -1.434191 | -2.091056 | -0.913544 | -1.433577 | -2.026579 | -0.923456 | -1.445145 |
| 6  | -1.730592 | 0.000000  | 0.555335  | -1.757518 | 0.000000  | 0.536977  | -1.764125 | 0.000000  | 0.533817  | -1.740027 | 0.000000  | 0.545384  |
| 6  | -1.501268 | 1.284279  | 1.183079  | -1.522807 | 1.288868  | 1.171488  | -1.526326 | 1.288433  | 1.165441  | -1.515224 | 1.294008  | 1.187834  |
| 1  | -1.248653 | 1.275198  | 2.244673  | -1.274171 | 1.278347  | 2.235862  | -1.282504 | 1.278705  | 2.228838  | -1.260243 | 1.282113  | 2.257952  |
| 8  | 0.000000  | -3.918714 | -1.032115 | 0.000000  | -3.932412 | -1.009745 | 0.000000  | -3.936258 | -0.996639 | 0.000000  | -3.932714 | -1.040101 |
| 6  | 0.000000  | -2.801582 | -0.698701 | 0.000000  | -2.814565 | -0.683219 | 0.000000  | -2.820323 | -0.679728 | 0.000000  | -2.805986 | -0.690905 |
| 1  | -2.163147 | 2.101299  | 0.900496  | -2.186282 | 2.109615  | 0.890856  | -2.189910 | 2.106421  | 0.883923  | -2.181283 | 2.120561  | 0.905600  |
| 6  | -1.501268 | -1.284279 | 1.183079  | -1.522807 | -1.288868 | 1.171488  | -1.526326 | -1.288433 | 1.165441  | -1.515224 | -1.294008 | 1.187834  |
| 1  | -2.163147 | -2.101299 | 0.900496  | -2.186282 | -2.109615 | 0.890856  | -2.189910 | -2.106421 | 0.883923  | -2.181283 | -2.120561 | 0.905600  |
| 1  | -1.248653 | -1.275198 | 2.244673  | -1.274171 | -1.278347 | 2.235862  | -1.282504 | -1.278705 | 2.228838  | -1.260243 | -1.282113 | 2.257952  |
| 6  | 1.767842  | 0.000000  | -0.878038 | 1.836502  | 0.000000  | -0.893523 | 1.842777  | 0.000000  | -0.895351 | 1.800106  | 0.000000  | -0.894737 |
| 1  | 2.004774  | -0.913710 | -1.420710 | 2.079881  | -0.915859 | -1.434191 | 2.091056  | -0.913544 | -1.433577 | 2.026579  | -0.923456 | -1.445145 |
| 1  | 2.004774  | 0.913710  | -1.420710 | 2.079881  | 0.915859  | -1.434191 | 2.091056  | 0.913544  | -1.433577 | 2.026579  | 0.923456  | -1.445145 |
| 6  | 1.730592  | 0.000000  | 0.555335  | 1.757518  | 0.000000  | 0.536977  | 1.764125  | 0.000000  | 0.533817  | 1.740027  | 0.000000  | 0.545384  |
| 6  | 1.501268  | -1.284279 | 1.183079  | 1.522807  | -1.288868 | 1.171488  | 1.526326  | -1.288433 | 1.165441  | 1.515224  | -1.294008 | 1.187834  |
| 1  | 1.248653  | -1.275198 | 2.244673  | 1.274171  | -1.278347 | 2.235862  | 1.282504  | -1.278705 | 2.228838  | 1.260243  | -1.282113 | 2.257952  |
| 6  | 0.000000  | 2.801582  | -0.698701 | 0.000000  | 2.814565  | -0.683219 | 0.000000  | 2.820323  | -0.679728 | 0.000000  | 2.805986  | -0.690905 |
| 8  | 0.000000  | 3.918714  | -1.032115 | 0.000000  | 3.932412  | -1.009745 | 0.000000  | 3.936258  | -0.996639 | 0.000000  | 3.932714  | -1.040101 |
| 1  | 2.163147  | -2.101299 | 0.900496  | 2.186282  | -2.109615 | 0.890856  | 2.189910  | -2.106421 | 0.883923  | 2.181283  | -2.120561 | 0.905600  |
| 6  | 1.501268  | 1.284279  | 1.183079  | 1.522807  | 1.288868  | 1.171488  | 1.526326  | 1.288433  | 1.165441  | 1.515224  | 1.294008  | 1.187834  |
| 1  | 2.163147  | 2.101299  | 0.900496  | 2.186282  | 2.109615  | 0.890856  | 2.189910  | 2.106421  | 0.883923  | 2.181283  | 2.120561  | 0.905600  |
| 1  | 1.248653  | 1.275198  | 2.244673  | 1.274171  | 1.278347  | 2.235862  | 1.282504  | 1.278705  | 2.228838  | 1.260243  | 1.282113  | 2.257952  |
| 27 | 0.000000  | -1.145033 | -0.120760 | 0.000000  | -1.150124 | -0.115791 | 0.000000  | -1.146019 | -0.115666 | 0.000000  | -1.160959 | -0.115869 |
| 27 | 0.000000  | 1.145033  | -0.120760 | 0.000000  | 1.150124  | -0.115791 | 0.000000  | 1.146019  | -0.115666 | 0.000000  | 1.160959  | -0.115869 |

**Table S6.** Optimized coordinates of the 2T-2 structure

|    | M06-L     |           |           | B3LYP*    |           |           | B3LYP     |           |           | BP86      |           |           |
|----|-----------|-----------|-----------|-----------|-----------|-----------|-----------|-----------|-----------|-----------|-----------|-----------|
|    | x         | y         | z         | x         | y         | z         | x         | y         | z         | x         | y         | z         |
| 6  | 0.006349  | -1.555186 | 1.206564  | -0.044297 | -1.549508 | 1.233282  | -0.052107 | -1.546290 | 1.233767  | 0.016948  | -1.676959 | 1.255009  |
| 1  | 1.050879  | -1.449180 | 1.489497  | 0.988816  | -1.362366 | 1.525294  | 0.975402  | -1.344381 | 1.528750  | 1.073050  | -1.607820 | 1.532131  |
| 1  | -0.640397 | -1.876108 | 2.028914  | -0.675599 | -1.918999 | 2.050790  | -0.678344 | -1.927323 | 2.047018  | -0.648721 | -1.992299 | 2.076897  |
| 6  | -0.360899 | -1.891876 | -0.135620 | -0.378815 | -1.870618 | -0.118169 | -0.377977 | -1.866962 | -0.116728 | -0.379055 | -1.941479 | -0.106943 |
| 6  | 0.608224  | -1.590871 | -1.225107 | 0.618498  | -1.561468 | -1.204806 | 0.623235  | -1.558347 | -1.200749 | 0.582841  | -1.600402 | -1.210581 |
| 1  | 0.117787  | -1.530730 | -2.201925 | 0.132522  | -1.491622 | -2.186027 | 0.139086  | -1.492972 | -2.181161 | 0.080533  | -1.530121 | -2.190792 |
| 8  | -3.963539 | 0.916158  | -0.268060 | -4.050736 | 0.961435  | -0.210172 | -4.068963 | 0.979885  | -0.194371 | -3.862263 | 0.857019  | -0.363851 |
| 6  | -2.899249 | 0.521889  | -0.022768 | -2.996764 | 0.537617  | 0.028382  | -3.022710 | 0.546100  | 0.039925  | -2.795116 | 0.471135  | -0.059247 |
| 1  | 1.405285  | -2.339467 | -1.268899 | 1.380399  | -2.351281 | -1.249295 | 1.375342  | -2.355637 | -1.241770 | 1.417912  | -2.319040 | -1.274165 |
| 6  | -1.751043 | -2.035410 | -0.363342 | -1.763777 | -2.068604 | -0.372684 | -1.760894 | -2.069656 | -0.375197 | -1.784198 | -2.068973 | -0.325026 |
| 1  | -2.381582 | -2.459963 | 0.417773  | -2.390861 | -2.537568 | 0.389931  | -2.383699 | -2.548141 | 0.382519  | -2.426287 | -2.495915 | 0.457567  |
| 1  | -2.120219 | -2.147646 | -1.379756 | -2.115661 | -2.171797 | -1.398862 | -2.107755 | -2.176318 | -1.400720 | -2.170036 | -2.135792 | -1.349198 |
| 6  | 1.751043  | 2.035410  | 0.363342  | 1.763777  | 2.068604  | 0.372684  | 1.760894  | 2.069656  | 0.375197  | 1.784198  | 2.068973  | 0.325026  |
| 1  | 2.120219  | 2.147646  | 1.379756  | 2.115661  | 2.171797  | 1.398862  | 2.107755  | 2.176318  | 1.400720  | 2.170036  | 2.135792  | 1.349198  |
| 1  | 2.381582  | 2.459963  | -0.417773 | 2.390861  | 2.537568  | -0.389931 | 2.383699  | 2.548141  | -0.382519 | 2.426287  | 2.495915  | -0.457567 |
| 6  | 0.360899  | 1.891876  | 0.135620  | 0.378815  | 1.870618  | 0.118169  | 0.377977  | 1.866962  | 0.116728  | 0.379055  | 1.941479  | 0.106943  |
| 6  | -0.608224 | 1.590871  | 1.225107  | -0.618498 | 1.561468  | 1.204806  | -0.623235 | 1.558347  | 1.200749  | -0.582841 | 1.600402  | 1.210581  |
| 1  | -1.405285 | 2.339467  | 1.268899  | -1.380399 | 2.351281  | 1.249295  | -1.375342 | 2.355637  | 1.241770  | -1.417912 | 2.319040  | 1.274165  |
| 6  | 2.899249  | -0.521889 | 0.022768  | 2.996764  | -0.537617 | -0.028382 | 3.022710  | -0.546100 | -0.039925 | 2.795116  | -0.471135 | 0.059247  |
| 8  | 3.963539  | -0.916158 | 0.268060  | 4.050736  | -0.961435 | 0.210172  | 4.068963  | -0.979885 | 0.194371  | 3.862263  | -0.857019 | 0.363851  |
| 1  | -0.117787 | 1.530730  | 2.201925  | -0.132522 | 1.491622  | 2.186027  | -0.139086 | 1.492972  | 2.181161  | -0.080533 | 1.530121  | 2.190792  |
| 6  | -0.006349 | 1.555186  | -1.206564 | 0.044297  | 1.549508  | -1.233282 | 0.052107  | 1.546290  | -1.233767 | -0.016948 | 1.676959  | -1.255009 |
| 1  | 0.640397  | 1.876108  | -2.028914 | 0.675599  | 1.918999  | -2.050790 | 0.678344  | 1.927323  | -2.047018 | 0.648721  | 1.992299  | -2.076897 |
| 1  | -1.050879 | 1.449180  | -1.489497 | -0.988816 | 1.362366  | -1.525294 | -0.975402 | 1.344381  | -1.528750 | -1.073050 | 1.607820  | -1.532131 |
| 27 | -1.313780 | -0.150963 | 0.426266  | -1.422816 | -0.163773 | 0.477088  | -1.443396 | -0.167153 | 0.485796  | -1.239538 | -0.178895 | 0.458768  |
| 27 | 1.313780  | 0.150963  | -0.426266 | 1.422816  | 0.163773  | -0.477088 | 1.443396  | 0.167153  | -0.485796 | 1.239538  | 0.178895  | -0.458768 |

**Table S7.** Optimized coordinates of the 2S-3 structure

|    | M06-L     |           |           | B3LYP*    |           |           | B3LYP     |           |           | BP86      |           |           |
|----|-----------|-----------|-----------|-----------|-----------|-----------|-----------|-----------|-----------|-----------|-----------|-----------|
|    | x         | y         | z         | x         | y         | z         | x         | y         | z         | x         | y         | z         |
| 6  | -1.177499 | 2.768504  | -0.354465 | -1.185962 | 2.809153  | -0.336466 | -1.184560 | 2.806590  | -0.335131 | -1.191589 | 2.812719  | -0.347742 |
| 1  | -1.187864 | 3.108754  | -1.387366 | -1.196270 | 3.160246  | -1.368513 | -1.196395 | 3.161171  | -1.363987 | -1.197284 | 3.155173  | -1.389620 |
| 1  | -2.148401 | 2.670045  | 0.126578  | -2.157844 | 2.712367  | 0.147983  | -2.154243 | 2.714025  | 0.150228  | -2.170784 | 2.709850  | 0.135666  |
| 6  | 0.000000  | 2.957009  | 0.437720  | 0.000000  | 2.965632  | 0.453844  | 0.000000  | 2.964854  | 0.453913  | 0.000000  | 2.972799  | 0.449193  |
| 6  | 1.177499  | 2.768504  | -0.354465 | 1.185962  | 2.809153  | -0.336466 | 1.184560  | 2.806590  | -0.335131 | 1.191589  | 2.812719  | -0.347742 |
| 1  | 2.148401  | 2.670045  | 0.126578  | 2.157844  | 2.712367  | 0.147983  | 2.154243  | 2.714025  | 0.150228  | 2.170784  | 2.709850  | 0.135666  |
| 8  | -2.578602 | 0.000000  | -0.883252 | -2.582294 | 0.000000  | -0.892710 | -2.593889 | 0.000000  | -0.878193 | -2.566739 | 0.000000  | -0.915401 |
| 6  | -1.461435 | 0.000000  | -0.503896 | -1.465006 | 0.000000  | -0.517676 | -1.477972 | 0.000000  | -0.514313 | -1.439626 | 0.000000  | -0.520820 |
| 1  | 1.187864  | 3.108754  | -1.387366 | 1.196270  | 3.160246  | -1.368513 | 1.196395  | 3.161171  | -1.363987 | 1.197284  | 3.155173  | -1.389620 |
| 6  | 0.000000  | 2.256427  | 1.692529  | 0.000000  | 2.266765  | 1.712377  | 0.000000  | 2.263909  | 1.708907  | 0.000000  | 2.273127  | 1.718402  |
| 1  | -0.922715 | 2.190588  | 2.264009  | -0.925541 | 2.187984  | 2.282556  | -0.923660 | 2.185774  | 2.278544  | -0.931649 | 2.194617  | 2.291534  |
| 1  | 0.922715  | 2.190588  | 2.264009  | 0.925541  | 2.187984  | 2.282556  | 0.923660  | 2.185774  | 2.278544  | 0.931649  | 2.194617  | 2.291534  |
| 6  | -1.177499 | -2.768504 | -0.354465 | -1.185962 | -2.809153 | -0.336466 | -1.184560 | -2.806590 | -0.335131 | -1.191589 | -2.812719 | -0.347742 |
| 1  | -2.148401 | -2.670045 | 0.126578  | -2.157844 | -2.712367 | 0.147983  | -2.154243 | -2.714025 | 0.150228  | -2.170784 | -2.709850 | 0.135666  |
| 1  | -1.187864 | -3.108754 | -1.387366 | -1.196270 | -3.160246 | -1.368513 | -1.196395 | -3.161171 | -1.363987 | -1.197284 | -3.155173 | -1.389620 |
| 6  | 0.000000  | -2.957009 | 0.437720  | 0.000000  | -2.965632 | 0.453844  | 0.000000  | -2.964854 | 0.453913  | 0.000000  | -2.972799 | 0.449193  |
| 6  | 0.000000  | -2.256427 | 1.692529  | 0.000000  | -2.266765 | 1.712377  | 0.000000  | -2.263909 | 1.708907  | 0.000000  | -2.273127 | 1.718402  |
| 1  | 0.922715  | -2.190588 | 2.264009  | 0.925541  | -2.187984 | 2.282556  | 0.923660  | -2.185774 | 2.278544  | 0.931649  | -2.194617 | 2.291534  |
| 6  | 1.461435  | 0.000000  | -0.503896 | 1.465006  | 0.000000  | -0.517676 | 1.477972  | 0.000000  | -0.514313 | 1.439626  | 0.000000  | -0.520820 |
| 8  | 2.578602  | 0.000000  | -0.883252 | 2.582294  | 0.000000  | -0.892710 | 2.593889  | 0.000000  | -0.878193 | 2.566739  | 0.000000  | -0.915401 |
| 1  | -0.922715 | -2.190588 | 2.264009  | -0.925541 | -2.187984 | 2.282556  | -0.923660 | -2.185774 | 2.278544  | -0.931649 | -2.194617 | 2.291534  |
| 6  | 1.177499  | -2.768504 | -0.354465 | 1.185962  | -2.809153 | -0.336466 | 1.184560  | -2.806590 | -0.335131 | 1.191589  | -2.812719 | -0.347742 |
| 1  | 1.187864  | -3.108754 | -1.387366 | 1.196270  | -3.160246 | -1.368513 | 1.196395  | -3.161171 | -1.363987 | 1.197284  | -3.155173 | -1.389620 |
| 1  | 2.148401  | -2.670045 | 0.126578  | 2.157844  | -2.712367 | 0.147983  | 2.154243  | -2.714025 | 0.150228  | 2.170784  | -2.709850 | 0.135666  |
| 27 | 0.000000  | -1.115379 | -0.016480 | 0.000000  | -1.115632 | -0.030965 | 0.000000  | -1.115944 | -0.036055 | 0.000000  | -1.117282 | -0.017026 |
| 27 | 0.000000  | 1.115379  | -0.016480 | 0.000000  | 1.115632  | -0.030965 | 0.000000  | 1.115944  | -0.036055 | 0.000000  | 1.117282  | -0.017026 |

**Table S8.** Optimized coordinates of the 2T-4 structure

|    | M06-L     |           |           | B3LYP*    |           |           | B3LYP     |           |           | BP86      |           |           |
|----|-----------|-----------|-----------|-----------|-----------|-----------|-----------|-----------|-----------|-----------|-----------|-----------|
|    | x         | y         | z         | x         | y         | z         | x         | y         | z         | x         | y         | z         |
| 6  | -1.200671 | 2.844717  | -0.396773 | -1.208309 | 2.880883  | -0.442889 | -1.206706 | 2.874483  | -0.472043 | -1.216900 | 2.892708  | -0.369050 |
| 1  | -1.228137 | 3.249444  | -1.407118 | -1.235845 | 3.239337  | -1.473410 | -1.233616 | 3.230458  | -1.501499 | -1.244844 | 3.272023  | -1.398850 |
| 1  | -2.158874 | 2.753148  | 0.108485  | -2.168027 | 2.808590  | 0.067387  | -2.164905 | 2.815742  | 0.038925  | -2.181457 | 2.797363  | 0.142077  |
| 6  | 0.000000  | 2.964394  | 0.372622  | 0.000000  | 3.008939  | 0.317616  | 0.000000  | 3.014866  | 0.288399  | 0.000000  | 2.991883  | 0.395435  |
| 6  | 1.200671  | 2.844717  | -0.396773 | 1.208309  | 2.880883  | -0.442889 | 1.206706  | 2.874483  | -0.472043 | 1.216900  | 2.892708  | -0.369050 |
| 1  | 2.158874  | 2.753148  | 0.108485  | 2.168027  | 2.808590  | 0.067387  | 2.164905  | 2.815742  | 0.038925  | 2.181457  | 2.797363  | 0.142077  |
| 8  | -2.705479 | 0.000000  | -0.127618 | -2.693046 | 0.000000  | -0.046928 | -2.698582 | 0.000000  | 0.068050  | -2.687358 | 0.000000  | -0.336099 |
| 6  | -1.526953 | 0.000000  | -0.201343 | -1.516293 | 0.000000  | -0.148342 | -1.535211 | 0.000000  | -0.096979 | -1.491160 | 0.000000  | -0.278079 |
| 1  | 1.228137  | 3.249444  | -1.407118 | 1.235845  | 3.239337  | -1.473410 | 1.233616  | 3.230458  | -1.501499 | 1.244844  | 3.272023  | -1.398850 |
| 6  | 0.000000  | 2.149361  | 1.560577  | 0.000000  | 2.257163  | 1.550405  | 0.000000  | 2.304797  | 1.541779  | 0.000000  | 2.186304  | 1.606220  |
| 1  | -0.923846 | 2.027798  | 2.122454  | -0.925849 | 2.157963  | 2.117612  | -0.924894 | 2.217063  | 2.108254  | -0.932030 | 2.060208  | 2.171033  |
| 1  | 0.923846  | 2.027798  | 2.122454  | 0.925849  | 2.157963  | 2.117612  | 0.924894  | 2.217063  | 2.108254  | 0.932030  | 2.060208  | 2.171033  |
| 6  | -1.200671 | -2.844717 | -0.396773 | -1.208309 | -2.880883 | -0.442889 | -1.206706 | -2.874483 | -0.472043 | -1.216900 | -2.892708 | -0.369050 |
| 1  | -2.158874 | -2.753148 | 0.108485  | -2.168027 | -2.808590 | 0.067387  | -2.164905 | -2.815742 | 0.038925  | -2.181457 | -2.797363 | 0.142077  |
| 1  | -1.228137 | -3.249444 | -1.407118 | -1.235845 | -3.239337 | -1.473410 | -1.233616 | -3.230458 | -1.501499 | -1.244844 | -3.272023 | -1.398850 |
| 6  | 0.000000  | -2.964394 | 0.372622  | 0.000000  | -3.008939 | 0.317616  | 0.000000  | -3.014866 | 0.288399  | 0.000000  | -2.991883 | 0.395435  |
| 6  | 0.000000  | -2.149361 | 1.560577  | 0.000000  | -2.257163 | 1.550405  | 0.000000  | -2.304797 | 1.541779  | 0.000000  | -2.186304 | 1.606220  |
| 1  | 0.923846  | -2.027798 | 2.122454  | 0.925849  | -2.157963 | 2.117612  | 0.924894  | -2.217063 | 2.108254  | 0.932030  | -2.060208 | 2.171033  |
| 6  | 1.526953  | 0.000000  | -0.201343 | 1.516293  | 0.000000  | -0.148342 | 1.535211  | 0.000000  | -0.096979 | 1.491160  | 0.000000  | -0.278079 |
| 8  | 2.705479  | 0.000000  | -0.127618 | 2.693046  | 0.000000  | -0.046928 | 2.698582  | 0.000000  | 0.068050  | 2.687358  | 0.000000  | -0.336099 |
| 1  | -0.923846 | -2.027798 | 2.122454  | -0.925849 | -2.157963 | 2.117612  | -0.924894 | -2.217063 | 2.108254  | -0.932030 | -2.060208 | 2.171033  |
| 6  | 1.200671  | -2.844717 | -0.396773 | 1.208309  | -2.880883 | -0.442889 | 1.206706  | -2.874483 | -0.472043 | 1.216900  | -2.892708 | -0.369050 |
| 1  | 1.228137  | -3.249444 | -1.407118 | 1.235845  | -3.239337 | -1.473410 | 1.233616  | -3.230458 | -1.501499 | 1.244844  | -3.272023 | -1.398850 |
| 1  | 2.158874  | -2.753148 | 0.108485  | 2.168027  | -2.808590 | 0.067387  | 2.164905  | -2.815742 | 0.038925  | 2.181457  | -2.797363 | 0.142077  |
| 27 | 0.000000  | -1.165317 | -0.231724 | 0.000000  | -1.174703 | -0.224117 | 0.000000  | -1.174442 | -0.243350 | 0.000000  | -1.169830 | -0.187132 |
| 27 | 0.000000  | 1.165317  | -0.231724 | 0.000000  | 1.174703  | -0.224117 | 0.000000  | 1.174442  | -0.243350 | 0.000000  | 1.169830  | -0.187132 |

**Table S9.** Optimized coordinates of the 3S-1 structure

|    | M06-L     |           |           | B3LYP*    |           |           | B3LYP     |           |           | BP86      |           |           |
|----|-----------|-----------|-----------|-----------|-----------|-----------|-----------|-----------|-----------|-----------|-----------|-----------|
|    | x         | y         | z         | x         | y         | z         | x         | y         | z         | x         | y         | z         |
| 6  | -0.788545 | 2.379188  | 1.193538  | -0.812132 | 2.348184  | 1.204180  | -0.813271 | 2.336500  | 1.203246  | -0.808987 | 2.404125  | 1.208681  |
| 1  | -1.850082 | 2.143599  | 1.211318  | -1.861807 | 2.060898  | 1.231513  | -1.859681 | 2.044873  | 1.233003  | -1.874782 | 2.151182  | 1.228282  |
| 1  | -0.333234 | 2.614551  | 2.153122  | -0.366886 | 2.616227  | 2.162739  | -0.373088 | 2.613167  | 2.159598  | -0.346070 | 2.640316  | 2.174536  |
| 6  | -0.220275 | 2.938124  | 0.000000  | -0.268542 | 2.918404  | 0.000000  | -0.278925 | 2.914604  | 0.000000  | -0.230103 | 2.946198  | 0.000000  |
| 6  | -0.788545 | 2.379188  | -1.193538 | -0.812132 | 2.348184  | -1.204180 | -0.813271 | 2.336500  | -1.203246 | -0.808987 | 2.404125  | -1.208681 |
| 1  | -0.333234 | 2.614551  | -2.153122 | -0.366886 | 2.616227  | -2.162739 | -0.373088 | 2.613167  | -2.159598 | -0.346070 | 2.640316  | -2.174536 |
| 6  | -1.870037 | -0.235282 | 0.000000  | -1.987169 | -0.346948 | 0.000000  | -2.010472 | -0.363101 | 0.000000  | -1.892579 | -0.287778 | 0.000000  |
| 8  | -2.928131 | 0.260904  | 0.000000  | -3.058181 | 0.112946  | 0.000000  | -3.079118 | 0.090149  | 0.000000  | -2.980611 | 0.174159  | 0.000000  |
| 8  | 1.711378  | -0.084548 | 2.327981  | 1.861220  | 0.043074  | 2.321913  | 1.881785  | 0.059998  | 2.320723  | 1.785307  | -0.004413 | 2.328093  |
| 6  | 1.177289  | 0.330435  | 1.378055  | 1.285480  | 0.422318  | 1.382263  | 1.304142  | 0.435354  | 1.385184  | 1.208002  | 0.374857  | 1.373712  |
| 1  | -1.850082 | 2.143599  | -1.211318 | -1.861807 | 2.060898  | -1.231513 | -1.859681 | 2.044873  | -1.233003 | -1.874782 | 2.151182  | -1.228282 |
| 6  | 1.202599  | 3.061877  | 0.000000  | 1.142216  | 3.151810  | 0.000000  | 1.127286  | 3.163762  | 0.000000  | 1.200782  | 3.098673  | 0.000000  |
| 1  | 1.714647  | 3.321240  | 0.922850  | 1.641338  | 3.436453  | 0.925585  | 1.621648  | 3.455795  | 0.923634  | 1.717814  | 3.355091  | 0.931699  |
| 1  | 1.714647  | 3.321240  | -0.922850 | 1.641338  | 3.436453  | -0.925585 | 1.621648  | 3.455795  | -0.923634 | 1.717814  | 3.355091  | -0.931699 |
| 6  | -0.788545 | -2.766805 | 1.167997  | -0.812132 | -2.822298 | 1.175304  | -0.813271 | -2.827502 | 1.174890  | -0.808987 | -2.802163 | 1.178810  |
| 1  | -0.303089 | -2.637345 | 2.135963  | -0.330406 | -2.685206 | 2.146145  | -0.330297 | -2.696561 | 2.143722  | -0.326128 | -2.661792 | 2.156252  |
| 1  | -1.824721 | -3.094814 | 1.191058  | -1.842879 | -3.175671 | 1.197218  | -1.840594 | -3.184860 | 1.198506  | -1.855571 | -3.128791 | 1.196529  |
| 6  | 0.010872  | -3.031228 | 0.000000  | -0.007842 | -3.052094 | 0.000000  | -0.011194 | -3.055467 | 0.000000  | -0.001016 | -3.056257 | 0.000000  |
| 6  | 1.309238  | -2.439217 | 0.000000  | 1.289700  | -2.455642 | 0.000000  | 1.280734  | -2.449528 | 0.000000  | 1.323089  | -2.502959 | 0.000000  |
| 1  | 1.884939  | -2.430994 | -0.922693 | 1.864472  | -2.425576 | -0.925255 | 1.855317  | -2.419045 | -0.923166 | 1.900034  | -2.489013 | -0.931841 |
| 6  | 1.177289  | 0.330435  | -1.378055 | 1.285480  | 0.422318  | -1.382263 | 1.304142  | 0.435354  | -1.385184 | 1.208002  | 0.374857  | -1.373712 |
| 8  | 1.711378  | -0.084548 | -2.327981 | 1.861220  | 0.043074  | -2.321913 | 1.881785  | 0.059998  | -2.320723 | 1.785307  | -0.004413 | -2.328093 |
| 1  | 1.884939  | -2.430994 | 0.922693  | 1.864472  | -2.425576 | 0.925255  | 1.855317  | -2.419045 | 0.923166  | 1.900034  | -2.489013 | 0.931841  |
| 6  | -0.788545 | -2.766805 | -1.167997 | -0.812132 | -2.822298 | -1.175304 | -0.813271 | -2.827502 | -1.174890 | -0.808987 | -2.802163 | -1.178810 |
| 1  | -1.824721 | -3.094814 | -1.191058 | -1.842879 | -3.175671 | -1.197218 | -1.840594 | -3.184860 | -1.198506 | -1.855571 | -3.128791 | -1.196529 |
| 1  | -0.303089 | -2.637345 | -2.135963 | -0.330406 | -2.685206 | -2.146145 | -0.330297 | -2.696561 | -2.143722 | -0.326128 | -2.661792 | -2.156252 |
| 27 | -0.388700 | -1.177786 | 0.000000  | -0.452768 | -1.189213 | 0.000000  | -0.460174 | -1.193478 | 0.000000  | -0.403999 | -1.182809 | 0.000000  |
| 27 | 0.376452  | 1.116808  | 0.000000  | 0.435490  | 1.118153  | 0.000000  | 0.445433  | 1.123043  | 0.000000  | 0.380593  | 1.110004  | 0.000000  |



**Table S10.** Optimized coordinates of the 3S-2 structure

|    | M06-L     |           |           | B3LYP*    |           |           | B3LYP     |           |           | BP86      |           |           |
|----|-----------|-----------|-----------|-----------|-----------|-----------|-----------|-----------|-----------|-----------|-----------|-----------|
|    | x         | y         | z         | x         | y         | z         | x         | y         | z         | x         | y         | z         |
| 6  | 0.556669  | -2.952244 | 1.220694  | 0.725934  | -2.945490 | 1.228452  | 0.703584  | -2.955878 | 1.226565  | 0.788674  | -2.911458 | 1.234786  |
| 1  | 1.607796  | -3.234155 | 1.273192  | 1.805055  | -3.105333 | 1.282275  | 1.778213  | -3.132659 | 1.280192  | 1.880144  | -3.025339 | 1.287303  |
| 1  | 0.015965  | -2.933630 | 2.162856  | 0.184053  | -2.980584 | 2.172185  | 0.162979  | -2.987492 | 2.168948  | 0.244437  | -2.961328 | 2.184034  |
| 6  | -0.160701 | -3.144316 | 0.000000  | 0.033063  | -3.190372 | 0.000000  | 0.007838  | -3.194278 | 0.000000  | 0.100947  | -3.181822 | 0.000000  |
| 6  | 0.556669  | -2.952244 | -1.220694 | 0.725934  | -2.945490 | -1.228452 | 0.703584  | -2.955878 | -1.226565 | 0.788674  | -2.911458 | -1.234786 |
| 1  | 0.015965  | -2.933630 | -2.162856 | 0.184053  | -2.980584 | -2.172185 | 0.162979  | -2.987492 | -2.168948 | 0.244437  | -2.961328 | -2.184034 |
| 6  | 1.781533  | 1.473610  | 0.000000  | 1.729594  | 1.470310  | 0.000000  | 1.741656  | 1.474746  | 0.000000  | 1.697681  | 1.451827  | 0.000000  |
| 8  | 2.899809  | 1.782036  | 0.000000  | 2.853467  | 1.758287  | 0.000000  | 2.862172  | 1.760646  | 0.000000  | 2.835080  | 1.738775  | 0.000000  |
| 8  | -0.423737 | -0.153821 | 2.617506  | -0.461874 | -0.157149 | 2.611671  | -0.455735 | -0.152857 | 2.609153  | -0.472099 | -0.170122 | 2.627795  |
| 6  | -0.108378 | -0.156712 | 1.475786  | -0.159363 | -0.158503 | 1.466270  | -0.154656 | -0.154734 | 1.467085  | -0.173481 | -0.168863 | 1.468265  |
| 1  | 1.607796  | -3.234155 | -1.273192 | 1.805055  | -3.105333 | -1.282275 | 1.778213  | -3.132659 | -1.280192 | 1.880144  | -3.025339 | -1.287303 |
| 6  | -1.403477 | -2.401442 | 0.000000  | -1.291602 | -2.597355 | 0.000000  | -1.307328 | -2.583585 | 0.000000  | -1.250687 | -2.634492 | 0.000000  |
| 1  | -1.971695 | -2.310871 | 0.924989  | -1.867817 | -2.573041 | 0.926084  | -1.883287 | -2.556564 | 0.923861  | -1.828564 | -2.619931 | 0.933144  |
| 1  | -1.971695 | -2.310871 | -0.924989 | -1.867817 | -2.573041 | -0.926084 | -1.883287 | -2.556564 | -0.923861 | -1.828564 | -2.619931 | -0.933144 |
| 6  | -0.423737 | 2.773163  | 1.218639  | -0.461874 | 2.826146  | 1.225355  | -0.455735 | 2.826528  | 1.223198  | -0.472099 | 2.824744  | 1.233014  |
| 1  | -0.884777 | 2.492028  | 2.162059  | -0.924584 | 2.548734  | 2.171366  | -0.918317 | 2.553236  | 2.168249  | -0.939612 | 2.542303  | 2.182797  |
| 1  | 0.352751  | 3.532541  | 1.268997  | 0.330528  | 3.572653  | 1.274853  | 0.332517  | 3.574785  | 1.271931  | 0.335389  | 3.564327  | 1.284349  |
| 6  | -1.159813 | 2.607742  | 0.000000  | -1.191789 | 2.653687  | 0.000000  | -1.187148 | 2.655083  | 0.000000  | -1.203809 | 2.657628  | 0.000000  |
| 6  | -2.007135 | 1.454591  | 0.000000  | -2.080140 | 1.528562  | 0.000000  | -2.071414 | 1.528414  | 0.000000  | -2.107177 | 1.535197  | 0.000000  |
| 1  | -2.490288 | 1.146751  | -0.925413 | -2.572882 | 1.234335  | -0.926765 | -2.565964 | 1.237181  | -0.924457 | -2.598298 | 1.236483  | -0.934030 |
| 6  | -0.108378 | -0.156712 | -1.475786 | -0.159363 | -0.158503 | -1.466270 | -0.154656 | -0.154734 | -1.467085 | -0.173481 | -0.168863 | -1.468265 |
| 8  | -0.423737 | -0.153821 | -2.617506 | -0.461874 | -0.157149 | -2.611671 | -0.455735 | -0.152857 | -2.609153 | -0.472099 | -0.170122 | -2.627795 |
| 1  | -2.490288 | 1.146751  | 0.925413  | -2.572882 | 1.234335  | 0.926765  | -2.565964 | 1.237181  | 0.924457  | -2.598298 | 1.236483  | 0.934030  |
| 6  | -0.423737 | 2.773163  | -1.218639 | -0.461874 | 2.826146  | -1.225355 | -0.455735 | 2.826528  | -1.223198 | -0.472099 | 2.824744  | -1.233014 |
| 1  | 0.352751  | 3.532541  | -1.268997 | 0.330528  | 3.572653  | -1.274853 | 0.332517  | 3.574785  | -1.271931 | 0.335389  | 3.564327  | -1.284349 |
| 1  | -0.884777 | 2.492028  | -2.162059 | -0.924584 | 2.548734  | -2.171366 | -0.918317 | 2.553236  | -2.168249 | -0.939612 | 2.542303  | -2.182797 |
| 27 | 0.037845  | 1.105256  | 0.000000  | -0.016480 | 1.115953  | 0.000000  | -0.010121 | 1.121029  | 0.000000  | -0.040055 | 1.103505  | 0.000000  |
| 27 | 0.248255  | -1.293851 | 0.000000  | 0.246199  | -1.293740 | 0.000000  | 0.245757  | -1.302130 | 0.000000  | 0.245503  | -1.272556 | 0.000000  |

**Table S11.** Optimized coordinates of the 3T-3 structure

|    | M06-L     |           |           | B3LYP*    |           |           | B3LYP     |           |           | BP86      |           |           |
|----|-----------|-----------|-----------|-----------|-----------|-----------|-----------|-----------|-----------|-----------|-----------|-----------|
|    | x         | y         | z         | x         | y         | z         | x         | y         | z         | x         | y         | z         |
| 6  | 1.202604  | 0.694324  | 2.677150  | 1.210003  | 0.698595  | 2.715021  | 1.208320  | 0.697624  | 2.710878  | 1.216465  | 0.702326  | 2.721851  |
| 1  | 1.231875  | 1.779456  | 2.748922  | 1.239448  | 1.785832  | 2.786409  | 1.238581  | 1.782621  | 2.787450  | 1.243884  | 1.796684  | 2.783277  |
| 1  | 2.156992  | 0.177107  | 2.748922  | 2.166300  | 0.180477  | 2.786409  | 2.163085  | 0.181332  | 2.787450  | 2.177916  | 0.178894  | 2.783277  |
| 6  | 0.000000  | 0.000000  | 3.027954  | 0.000000  | 0.000000  | 3.045527  | 0.000000  | 0.000000  | 3.045858  | 0.000000  | 0.000000  | 3.047609  |
| 6  | -1.202604 | 0.694324  | 2.677150  | -1.210003 | 0.698595  | 2.715021  | -1.208320 | 0.697624  | 2.710878  | -1.216465 | 0.702326  | 2.721851  |
| 1  | -2.156992 | 0.177107  | 2.748922  | -2.166300 | 0.180477  | 2.786409  | -2.163085 | 0.181332  | 2.787450  | -2.177916 | 0.178894  | 2.783277  |
| 6  | 0.000000  | 1.610594  | 0.000000  | 0.000000  | 1.603275  | 0.000000  | 0.000000  | 1.611226  | 0.000000  | 0.000000  | 1.592328  | 0.000000  |
| 8  | 0.000000  | 2.783486  | 0.000000  | 0.000000  | 2.776598  | 0.000000  | 0.000000  | 2.780354  | 0.000000  | 0.000000  | 2.779615  | 0.000000  |
| 8  | 2.410570  | -1.391743 | 0.000000  | 2.404605  | -1.388299 | 0.000000  | 2.407857  | -1.390177 | 0.000000  | 2.407217  | -1.389807 | 0.000000  |
| 6  | 1.394815  | -0.805297 | 0.000000  | 1.388477  | -0.801637 | 0.000000  | 1.395363  | -0.805613 | 0.000000  | 1.378996  | -0.796164 | 0.000000  |
| 1  | -1.231875 | 1.779456  | 2.748922  | -1.239448 | 1.785832  | 2.786409  | -1.238581 | 1.782621  | 2.787450  | -1.243884 | 1.796684  | 2.783277  |
| 6  | 0.000000  | -1.388648 | 2.677150  | 0.000000  | -1.397191 | 2.715021  | 0.000000  | -1.395247 | 2.710878  | 0.000000  | -1.404652 | 2.721851  |
| 1  | 0.925117  | -1.956563 | 2.748922  | 0.926852  | -1.966309 | 2.786409  | 0.924505  | -1.963953 | 2.787450  | 0.934032  | -1.975577 | 2.783277  |
| 1  | -0.925117 | -1.956563 | 2.748922  | -0.926852 | -1.966309 | 2.786409  | -0.924505 | -1.963953 | 2.787450  | -0.934032 | -1.975577 | 2.783277  |
| 6  | 1.202604  | 0.694324  | -2.677150 | 1.210003  | 0.698595  | -2.715021 | 1.208320  | 0.697624  | -2.710878 | 1.216465  | 0.702326  | -2.721851 |
| 1  | 2.156992  | 0.177107  | -2.748922 | 2.166300  | 0.180477  | -2.786409 | 2.163085  | 0.181332  | -2.787450 | 2.177916  | 0.178894  | -2.783277 |
| 1  | 1.231875  | 1.779456  | -2.748922 | 1.239448  | 1.785832  | -2.786409 | 1.238581  | 1.782621  | -2.787450 | 1.243884  | 1.796684  | -2.783277 |
| 6  | 0.000000  | 0.000000  | -3.027954 | 0.000000  | 0.000000  | -3.045527 | 0.000000  | 0.000000  | -3.045858 | 0.000000  | 0.000000  | -3.047609 |
| 6  | 0.000000  | -1.388648 | -2.677150 | 0.000000  | -1.397191 | -2.715021 | 0.000000  | -1.395247 | -2.710878 | 0.000000  | -1.404652 | -2.721851 |
| 1  | -0.925117 | -1.956563 | -2.748922 | -0.926852 | -1.966309 | -2.786409 | -0.924505 | -1.963953 | -2.787450 | -0.934032 | -1.975577 | -2.783277 |
| 6  | -1.394815 | -0.805297 | 0.000000  | -1.388477 | -0.801637 | 0.000000  | -1.395363 | -0.805613 | 0.000000  | -1.378996 | -0.796164 | 0.000000  |
| 8  | -2.410570 | -1.391743 | 0.000000  | -2.404605 | -1.388299 | 0.000000  | -2.407857 | -1.390177 | 0.000000  | -2.407217 | -1.389807 | 0.000000  |
| 1  | 0.925117  | -1.956563 | -2.748922 | 0.926852  | -1.966309 | -2.786409 | 0.924505  | -1.963953 | -2.787450 | 0.934032  | -1.975577 | -2.783277 |
| 6  | -1.202604 | 0.694324  | -2.677150 | -1.210003 | 0.698595  | -2.715021 | -1.208320 | 0.697624  | -2.710878 | -1.216465 | 0.702326  | -2.721851 |
| 1  | -1.231875 | 1.779456  | -2.748922 | -1.239448 | 1.785832  | -2.786409 | -1.238581 | 1.782621  | -2.787450 | -1.243884 | 1.796684  | -2.783277 |
| 1  | -2.156992 | 0.177107  | -2.748922 | -2.166300 | 0.180477  | -2.786409 | -2.163085 | 0.181332  | -2.787450 | -2.177916 | 0.178894  | -2.783277 |
| 27 | 0.000000  | 0.000000  | -1.115591 | 0.000000  | 0.000000  | -1.122733 | 0.000000  | 0.000000  | -1.126118 | 0.000000  | 0.000000  | -1.114348 |
| 27 | 0.000000  | 0.000000  | 1.115591  | 0.000000  | 0.000000  | 1.122733  | 0.000000  | 0.000000  | 1.126118  | 0.000000  | 0.000000  | 1.114348  |

**Table S12.** Optimized coordinates of the 4S-1 structure

|    | M06-L     |           |           | B3LYP*    |           |           | B3LYP     |           |           | BP86      |           |           |
|----|-----------|-----------|-----------|-----------|-----------|-----------|-----------|-----------|-----------|-----------|-----------|-----------|
|    | x         | y         | z         | x         | y         | z         | x         | y         | z         | x         | y         | z         |
| 6  | -1.758691 | 1.856207  | 0.000000  | -1.783217 | 1.920246  | 0.000000  | -1.781556 | 1.923402  | 0.000000  | -1.792318 | 1.910269  | 0.000000  |
| 1  | -2.284189 | 1.621383  | 0.924158  | -2.312451 | 1.693996  | 0.925997  | -2.312564 | 1.701697  | 0.923875  | -2.318791 | 1.675036  | 0.932917  |
| 1  | -2.284189 | 1.621383  | -0.924158 | -2.312451 | 1.693996  | -0.925997 | -2.312564 | 1.701697  | -0.923875 | -2.318791 | 1.675036  | -0.932917 |
| 6  | -0.759120 | 2.876729  | 0.000000  | -0.754723 | 2.913378  | 0.000000  | -0.755546 | 2.917324  | 0.000000  | -0.756650 | 2.906297  | 0.000000  |
| 6  | 0.000000  | 2.933205  | 1.214254  | 0.000000  | 2.982564  | 1.220690  | 0.000000  | 2.983730  | 1.218865  | 0.000000  | 2.978020  | 1.227411  |
| 1  | 0.877466  | 3.573329  | 1.261869  | 0.883052  | 3.619440  | 1.268151  | 0.880373  | 3.621173  | 1.266166  | 0.891056  | 3.614753  | 1.274984  |
| 6  | 2.015999  | 1.313288  | 0.000000  | 2.013666  | 1.356156  | 0.000000  | 2.018710  | 1.357907  | 0.000000  | 1.999975  | 1.358776  | 0.000000  |
| 8  | 3.170685  | 1.409486  | 0.000000  | 3.166327  | 1.473821  | 0.000000  | 3.167671  | 1.472979  | 0.000000  | 3.164224  | 1.494341  | 0.000000  |
| 8  | 0.000000  | 0.000000  | 2.667109  | 0.000000  | 0.000000  | 2.650701  | 0.000000  | 0.000000  | 2.647911  | 0.000000  | 0.000000  | 2.665112  |
| 6  | 0.000000  | 0.000000  | 1.486345  | 0.000000  | 0.000000  | 1.468884  | 0.000000  | 0.000000  | 1.469415  | 0.000000  | 0.000000  | 1.471355  |
| 1  | -0.491026 | 2.723005  | 2.160892  | -0.490333 | 2.770751  | 2.169862  | -0.490623 | 2.776705  | 2.166748  | -0.491908 | 2.757062  | 2.181202  |
| 6  | 0.000000  | 2.933205  | -1.214254 | 0.000000  | 2.982564  | -1.220690 | 0.000000  | 2.983730  | -1.218865 | 0.000000  | 2.978020  | -1.227411 |
| 1  | -0.491026 | 2.723005  | -2.160892 | -0.490333 | 2.770751  | -2.169862 | -0.490623 | 2.776705  | -2.166748 | -0.491908 | 2.757062  | -2.181202 |
| 1  | 0.877466  | 3.573329  | -1.261869 | 0.883052  | 3.619440  | -1.268151 | 0.880373  | 3.621173  | -1.266166 | 0.891056  | 3.614753  | -1.274984 |
| 6  | 0.000000  | -2.933205 | 1.214254  | 0.000000  | -2.982564 | 1.220690  | 0.000000  | -2.983730 | 1.218865  | 0.000000  | -2.978020 | 1.227411  |
| 1  | -0.877466 | -3.573329 | 1.261869  | -0.883052 | -3.619440 | 1.268151  | -0.880373 | -3.621173 | 1.266166  | -0.891056 | -3.614753 | 1.274984  |
| 1  | 0.491026  | -2.723005 | 2.160892  | 0.490333  | -2.770751 | 2.169862  | 0.490623  | -2.776705 | 2.166748  | 0.491908  | -2.757062 | 2.181202  |
| 6  | 0.759120  | -2.876729 | 0.000000  | 0.754723  | -2.913378 | 0.000000  | 0.755546  | -2.917324 | 0.000000  | 0.756650  | -2.906297 | 0.000000  |
| 6  | 0.000000  | -2.933205 | -1.214254 | 0.000000  | -2.982564 | -1.220690 | 0.000000  | -2.983730 | -1.218865 | 0.000000  | -2.978020 | -1.227411 |
| 1  | 0.491026  | -2.723005 | -2.160892 | 0.490333  | -2.770751 | -2.169862 | 0.490623  | -2.776705 | -2.166748 | 0.491908  | -2.757062 | -2.181202 |
| 6  | 0.000000  | 0.000000  | -1.486345 | 0.000000  | 0.000000  | -1.468884 | 0.000000  | 0.000000  | -1.469415 | 0.000000  | 0.000000  | -1.471355 |
| 8  | 0.000000  | 0.000000  | -2.667109 | 0.000000  | 0.000000  | -2.650701 | 0.000000  | 0.000000  | -2.647911 | 0.000000  | 0.000000  | -2.665112 |
| 8  | -3.170685 | -1.409486 | 0.000000  | -3.166327 | -1.473821 | 0.000000  | -3.167671 | -1.472979 | 0.000000  | -3.164224 | -1.494341 | 0.000000  |
| 6  | -2.015999 | -1.313288 | 0.000000  | -2.013666 | -1.356156 | 0.000000  | -2.018710 | -1.357907 | 0.000000  | -1.999975 | -1.358776 | 0.000000  |
| 1  | -0.877466 | -3.573329 | -1.261869 | -0.883052 | -3.619440 | -1.268151 | -0.880373 | -3.621173 | -1.266166 | -0.891056 | -3.614753 | -1.274984 |
| 6  | 1.758691  | -1.856207 | 0.000000  | 1.783217  | -1.920246 | 0.000000  | 1.781556  | -1.923402 | 0.000000  | 1.792318  | -1.910269 | 0.000000  |
| 1  | 2.284189  | -1.621383 | 0.924158  | 2.312451  | -1.693996 | 0.925997  | 2.312564  | -1.701697 | 0.923875  | 2.318791  | -1.675036 | 0.932917  |
| 1  | 2.284189  | -1.621383 | -0.924158 | 2.312451  | -1.693996 | -0.925997 | 2.312564  | -1.701697 | -0.923875 | 2.318791  | -1.675036 | -0.932917 |
| 27 | -0.230655 | -1.230531 | 0.000000  | -0.230001 | -1.246896 | 0.000000  | -0.227594 | -1.251587 | 0.000000  | -0.231418 | -1.235629 | 0.000000  |
| 27 | 0.230655  | 1.230531  | 0.000000  | 0.230001  | 1.246896  | 0.000000  | 0.227594  | 1.251587  | 0.000000  | 0.231418  | 1.235629  | 0.000000  |

**Table S13.** Optimized coordinates of the 4S-2 structure

|    | M06-L     |           |           | B3LYP*    |           |           | B3LYP     |           |           | BP86      |           |           |
|----|-----------|-----------|-----------|-----------|-----------|-----------|-----------|-----------|-----------|-----------|-----------|-----------|
|    | x         | y         | z         | x         | y         | z         | x         | y         | z         | x         | y         | z         |
| 6  | 0.000000  | 1.652845  | -2.032992 | 0.000000  | 1.699062  | -2.070570 | 0.000000  | 1.703729  | -2.068435 | 0.000000  | 1.689219  | -2.081067 |
| 1  | -0.924898 | 1.364094  | -2.529124 | -0.926211 | 1.414671  | -2.569827 | -0.924010 | 1.422455  | -2.569327 | -0.933344 | 1.400138  | -2.578783 |
| 1  | 0.924898  | 1.364094  | -2.529124 | 0.926211  | 1.414671  | -2.569827 | 0.924010  | 1.422455  | -2.569327 | 0.933344  | 1.400138  | -2.578783 |
| 6  | 0.000000  | 2.778598  | -1.153740 | 0.000000  | 2.808413  | -1.168606 | 0.000000  | 2.813029  | -1.168608 | 0.000000  | 2.801323  | -1.170904 |
| 6  | -1.213910 | 2.920003  | -0.404304 | -1.220432 | 2.966975  | -0.426452 | -1.218600 | 2.968706  | -0.425127 | -1.227146 | 2.961693  | -0.427145 |
| 1  | -1.261047 | 3.658192  | 0.392564  | -1.267638 | 3.706927  | 0.372261  | -1.265598 | 3.708704  | 0.371042  | -1.274663 | 3.701509  | 0.380395  |
| 6  | 0.000000  | 1.570872  | 1.773541  | 0.000000  | 1.619375  | 1.759587  | 0.000000  | 1.622416  | 1.764527  | 0.000000  | 1.615642  | 1.744454  |
| 8  | 0.000000  | 1.833576  | 2.901332  | 0.000000  | 1.903688  | 2.882109  | 0.000000  | 1.904209  | 2.883822  | 0.000000  | 1.914203  | 2.876710  |
| 8  | 2.630342  | 0.000000  | -0.402633 | 2.632926  | 0.000000  | -0.283676 | 2.630067  | 0.000000  | -0.283435 | 2.650069  | 0.000000  | -0.264633 |
| 6  | 1.474104  | 0.000000  | -0.160023 | 1.462082  | 0.000000  | -0.120766 | 1.462399  | 0.000000  | -0.122124 | 1.465594  | 0.000000  | -0.112875 |
| 1  | -2.160541 | 2.651595  | -0.866431 | -2.169720 | 2.694993  | -0.885907 | -2.166622 | 2.701656  | -0.885538 | -2.181058 | 2.681030  | -0.887445 |
| 6  | 1.213910  | 2.920003  | -0.404304 | 1.220432  | 2.966975  | -0.426452 | 1.218600  | 2.968706  | -0.425127 | 1.227146  | 2.961693  | -0.427145 |
| 1  | 2.160541  | 2.651595  | -0.866431 | 2.169720  | 2.694993  | -0.885907 | 2.166622  | 2.701656  | -0.885538 | 2.181058  | 2.681030  | -0.887445 |
| 1  | 1.261047  | 3.658192  | 0.392564  | 1.267638  | 3.706927  | 0.372261  | 1.265598  | 3.708704  | 0.371042  | 1.274663  | 3.701509  | 0.380395  |
| 6  | -1.213910 | -2.920003 | -0.404304 | -1.220432 | -2.966975 | -0.426452 | -1.218600 | -2.968706 | -0.425127 | -1.227146 | -2.961693 | -0.427145 |
| 1  | -2.160541 | -2.651595 | -0.866431 | -2.169720 | -2.694993 | -0.885907 | -2.166622 | -2.701656 | -0.885538 | -2.181058 | -2.681030 | -0.887445 |
| 1  | -1.261047 | -3.658192 | 0.392564  | -1.267638 | -3.706927 | 0.372261  | -1.265598 | -3.708704 | 0.371042  | -1.274663 | -3.701509 | 0.380395  |
| 6  | 0.000000  | -2.778598 | -1.153740 | 0.000000  | -2.808413 | -1.168606 | 0.000000  | -2.813029 | -1.168608 | 0.000000  | -2.801323 | -1.170904 |
| 6  | 0.000000  | -1.652845 | -2.032992 | 0.000000  | -1.699062 | -2.070570 | 0.000000  | -1.703729 | -2.068435 | 0.000000  | -1.689219 | -2.081067 |
| 1  | 0.924898  | -1.364094 | -2.529124 | 0.926211  | -1.414671 | -2.569827 | 0.924010  | -1.422455 | -2.569327 | 0.933344  | -1.400138 | -2.578783 |
| 6  | -1.474104 | 0.000000  | -0.160023 | -1.462082 | 0.000000  | -0.120766 | -1.462399 | 0.000000  | -0.122124 | -1.465594 | 0.000000  | -0.112875 |
| 8  | -2.630342 | 0.000000  | -0.402633 | -2.632926 | 0.000000  | -0.283676 | -2.630067 | 0.000000  | -0.283435 | -2.650069 | 0.000000  | -0.264633 |
| 8  | 0.000000  | -1.833576 | 2.901332  | 0.000000  | -1.903688 | 2.882109  | 0.000000  | -1.904209 | 2.883822  | 0.000000  | -1.914203 | 2.876710  |
| 6  | 0.000000  | -1.570872 | 1.773541  | 0.000000  | -1.619375 | 1.759587  | 0.000000  | -1.622416 | 1.764527  | 0.000000  | -1.615642 | 1.744454  |
| 1  | -0.924898 | -1.364094 | -2.529124 | -0.926211 | -1.414671 | -2.569827 | -0.924010 | -1.422455 | -2.569327 | -0.933344 | -1.400138 | -2.578783 |
| 6  | 1.213910  | -2.920003 | -0.404304 | 1.220432  | -2.966975 | -0.426452 | 1.218600  | -2.968706 | -0.425127 | 1.227146  | -2.961693 | -0.427145 |
| 1  | 1.261047  | -3.658192 | 0.392564  | 1.267638  | -3.706927 | 0.372261  | 1.265598  | -3.708704 | 0.371042  | 1.274663  | -3.701509 | 0.380395  |
| 1  | 2.160541  | -2.651595 | -0.866431 | 2.169720  | -2.694993 | -0.885907 | 2.166622  | -2.701656 | -0.885538 | 2.181058  | -2.681030 | -0.887445 |
| 27 | 0.000000  | -1.253260 | 0.011383  | 0.000000  | -1.269346 | 0.003668  | 0.000000  | -1.273818 | 0.001256  | 0.000000  | -1.258121 | 0.004561  |
| 27 | 0.000000  | 1.253260  | 0.011383  | 0.000000  | 1.269346  | 0.003668  | 0.000000  | 1.273818  | 0.001256  | 0.000000  | 1.258121  | 0.004561  |

**Table S14.** Optimized coordinates of the 4S-3 structure

|    | M06-L     |           |           | B3LYP*    |           |           | B3LYP     |           |           | BP86      |           |           |
|----|-----------|-----------|-----------|-----------|-----------|-----------|-----------|-----------|-----------|-----------|-----------|-----------|
|    | x         | y         | z         | x         | y         | z         | x         | y         | z         | x         | y         | z         |
| 6  | 1.955275  | -1.602299 | 0.697909  | 1.934944  | -1.708018 | 0.805606  | 1.875406  | -1.758056 | 0.878626  | 1.973008  | -1.685034 | 0.742189  |
| 1  | 2.008372  | -1.943987 | 1.729371  | 1.925694  | -2.080914 | 1.829829  | 1.820455  | -2.137654 | 1.896985  | 1.995557  | -2.053516 | 1.774583  |
| 1  | 2.647053  | -0.806279 | 0.428359  | 2.657237  | -0.920169 | 0.594895  | 2.625919  | -0.991079 | 0.702238  | 2.679973  | -0.883162 | 0.501169  |
| 6  | 1.507794  | -2.505653 | -0.322143 | 1.503145  | -2.565370 | -0.262853 | 1.469242  | -2.599333 | -0.210572 | 1.503902  | -2.551741 | -0.312679 |
| 6  | 0.458758  | -3.392680 | 0.073311  | 0.426581  | -3.455184 | 0.057737  | 0.360070  | -3.462459 | 0.061313  | 0.438771  | -3.451929 | 0.049463  |
| 1  | -0.045815 | -3.990086 | -0.681712 | -0.055490 | -4.024174 | -0.736687 | -0.100571 | -4.016517 | -0.753543 | -0.073740 | -4.025570 | -0.731448 |
| 6  | -1.389783 | -1.240184 | -1.089131 | -1.333873 | -1.283380 | -1.157415 | -1.307985 | -1.262667 | -1.210044 | -1.363176 | -1.290622 | -1.103849 |
| 8  | -2.319802 | -1.218970 | -1.787710 | -2.222091 | -1.296113 | -1.907833 | -2.161304 | -1.270460 | -1.994110 | -2.290667 | -1.310343 | -1.826824 |
| 8  | -1.294315 | -1.123607 | 2.595139  | -1.389713 | -1.206452 | 2.556894  | -1.469242 | -1.181185 | 2.521485  | -1.340408 | -1.233629 | 2.587089  |
| 6  | -0.773575 | -1.176732 | 1.559259  | -0.831221 | -1.222864 | 1.539323  | -0.890911 | -1.205305 | 1.519290  | -0.788641 | -1.234826 | 1.551356  |
| 1  | 0.448346  | -3.790672 | 1.084837  | 0.354858  | -3.874346 | 1.060976  | 0.240832  | -3.886743 | 1.055795  | 0.402608  | -3.868906 | 1.062594  |
| 6  | 1.294315  | -1.868820 | -1.589536 | 1.389713  | -1.908289 | -1.535397 | 1.421550  | -1.931807 | -1.480018 | 1.340408  | -1.894365 | -1.588309 |
| 1  | 1.984650  | -1.099325 | -1.922244 | 2.110294  | -1.141125 | -1.809573 | 2.172276  | -1.184607 | -1.718630 | 2.043736  | -1.110915 | -1.887628 |
| 1  | 0.804185  | -2.435396 | -2.378371 | 0.934836  | -2.447849 | -2.366635 | 0.993011  | -2.455370 | -2.332728 | 0.851364  | -2.438899 | -2.405308 |
| 6  | -1.955275 | 1.602299  | 0.697909  | -1.934944 | 1.708018  | 0.805606  | -1.875406 | 1.758056  | 0.878626  | -1.973008 | 1.685034  | 0.742189  |
| 1  | -2.008372 | 1.943987  | 1.729371  | -1.925694 | 2.080914  | 1.829829  | -1.820455 | 2.137654  | 1.896985  | -1.995557 | 2.053516  | 1.774583  |
| 1  | -2.647053 | 0.806279  | 0.428359  | -2.657237 | 0.920169  | 0.594895  | -2.625919 | 0.991079  | 0.702238  | -2.679973 | 0.883162  | 0.501169  |
| 6  | -1.507794 | 2.505653  | -0.322143 | -1.503145 | 2.565370  | -0.262853 | -1.469242 | 2.599333  | -0.210572 | -1.503902 | 2.551741  | -0.312679 |
| 6  | -0.458758 | 3.392680  | 0.073311  | -0.426581 | 3.455184  | 0.057737  | -0.360070 | 3.462459  | 0.061313  | -0.438771 | 3.451929  | 0.049463  |
| 1  | 0.045815  | 3.990086  | -0.681712 | 0.055490  | 4.024174  | -0.736687 | 0.100571  | 4.016517  | -0.753543 | 0.073740  | 4.025570  | -0.731448 |
| 6  | 1.389783  | 1.240184  | -1.089131 | 1.333873  | 1.283380  | -1.157415 | 1.307985  | 1.262667  | -1.210044 | 1.363176  | 1.290622  | -1.103849 |
| 8  | 2.319802  | 1.218970  | -1.787710 | 2.222091  | 1.296113  | -1.907833 | 2.161304  | 1.270460  | -1.994110 | 2.290667  | 1.310343  | -1.826824 |
| 8  | 1.294315  | 1.123607  | 2.595139  | 1.389713  | 1.206452  | 2.556894  | 1.469242  | 1.181185  | 2.521485  | 1.340408  | 1.233629  | 2.587089  |
| 6  | 0.773575  | 1.176732  | 1.559259  | 0.831221  | 1.222864  | 1.539323  | 0.890911  | 1.205305  | 1.519290  | 0.788641  | 1.234826  | 1.551356  |
| 1  | -0.448346 | 3.790672  | 1.084837  | -0.354858 | 3.874346  | 1.060976  | -0.240832 | 3.886743  | 1.055795  | -0.402608 | 3.868906  | 1.062594  |
| 6  | -1.294315 | 1.868820  | -1.589536 | -1.389713 | 1.908289  | -1.535397 | -1.421550 | 1.931807  | -1.480018 | -1.340408 | 1.894365  | -1.588309 |
| 1  | -1.984650 | 1.099325  | -1.922244 | -2.110294 | 1.141125  | -1.809573 | -2.172276 | 1.184607  | -1.718630 | -2.043736 | 1.110915  | -1.887628 |
| 1  | -0.804185 | 2.435396  | -2.378371 | -0.934836 | 2.447849  | -2.366635 | -0.993011 | 2.455370  | -2.332728 | -0.851364 | 2.438899  | -2.405308 |
| 27 | -0.015898 | 1.338771  | -0.025840 | -0.011876 | 1.360441  | -0.016567 | 0.001895  | 1.361289  | -0.015581 | -0.010907 | 1.356104  | -0.015745 |
| 27 | 0.015898  | -1.338771 | -0.025840 | 0.011876  | -1.360441 | -0.016567 | -0.001895 | -1.361289 | -0.015581 | 0.010907  | -1.356104 | -0.015745 |

**Table S15.** Optimized coordinates of the 5S structure

|    | M06-L     |           |           | B3LYP*    |           |           | B3LYP     |           |           | BP86      |           |           |
|----|-----------|-----------|-----------|-----------|-----------|-----------|-----------|-----------|-----------|-----------|-----------|-----------|
|    | x         | y         | z         | x         | y         | z         | x         | y         | z         | x         | y         | z         |
| 6  | -2.533457 | -1.037957 | -1.573216 | -2.584515 | -1.211542 | -1.482365 | -2.510479 | -1.161649 | -1.559233 | -3.089909 | -0.653199 | -1.309351 |
| 1  | -2.116193 | -0.723923 | -2.525769 | -2.131024 | -1.032311 | -2.454687 | -2.033793 | -0.932260 | -2.507180 | -2.779399 | -0.490169 | -2.347326 |
| 1  | -2.763791 | -2.096022 | -1.471818 | -2.852843 | -2.243733 | -1.256153 | -2.770483 | -2.205389 | -1.393421 | -3.624370 | -1.587666 | -1.101067 |
| 6  | -3.274870 | -0.097977 | -0.785301 | -3.297886 | -0.154707 | -0.822331 | -3.266963 | -0.150064 | -0.879966 | -3.278652 | 0.476780  | -0.428263 |
| 6  | -2.764928 | 1.240069  | -0.832309 | -2.769200 | 1.163768  | -1.028652 | -2.752225 | 1.183237  | -0.999986 | -2.398312 | 1.582693  | -0.694897 |
| 1  | -3.175189 | 1.980972  | -0.150105 | -3.179174 | 1.992435  | -0.451142 | -3.200823 | 1.975024  | -0.403297 | -2.348614 | 2.419345  | 0.012272  |
| 8  | -0.533055 | -2.834875 | 0.919843  | -0.690136 | -2.745358 | 1.264175  | -0.668721 | -2.797231 | 1.162355  | -1.431601 | -3.035495 | 0.908913  |
| 6  | -0.902683 | -1.787502 | 0.594401  | -1.012089 | -1.731292 | 0.809436  | -1.002804 | -1.770054 | 0.756627  | -1.440301 | -1.917388 | 0.567744  |
| 1  | -2.355493 | 1.618762  | -1.764951 | -2.325478 | 1.419559  | -1.988889 | -2.283892 | 1.493692  | -1.929696 | -2.094397 | 1.795221  | -1.726621 |
| 6  | -3.593630 | -0.559762 | 0.531931  | -3.677524 | -0.444840 | 0.531542  | -3.687969 | -0.511514 | 0.442786  | -3.453484 | 0.158104  | 0.966794  |
| 1  | -3.831288 | -1.608933 | 0.686988  | -3.947190 | -1.463522 | 0.808677  | -3.951656 | -1.544420 | 0.658900  | -3.993004 | -0.753269 | 1.249200  |
| 1  | -4.007164 | 0.136614  | 1.256773  | -4.087949 | 0.346713  | 1.157763  | -4.137272 | 0.240057  | 1.088062  | -3.424177 | 0.958683  | 1.714260  |
| 6  | 1.810420  | -1.387660 | -0.950729 | 1.871696  | -1.516931 | -0.682254 | 1.900205  | -1.461340 | -0.771899 | 1.709268  | -1.643209 | -0.128587 |
| 1  | 1.684165  | -2.318816 | -0.392071 | 1.761328  | -2.341267 | 0.029474  | 1.752121  | -2.329940 | -0.125527 | 1.724077  | -2.179657 | 0.833736  |
| 1  | 1.396184  | -1.472462 | -1.959663 | 1.447996  | -1.784143 | -1.657105 | 1.534098  | -1.667540 | -1.782179 | 1.097997  | -2.180209 | -0.872575 |
| 6  | 3.139016  | -0.738316 | -0.878560 | 3.217722  | -0.874883 | -0.752995 | 3.251636  | -0.826715 | -0.730856 | 3.023531  | -1.147105 | -0.649566 |
| 6  | 4.285130  | -1.261759 | -0.400066 | 4.396378  | -1.359584 | -0.307630 | 4.403769  | -1.355331 | -0.273329 | 4.269730  | -1.573953 | -0.327657 |
| 1  | 5.164249  | -0.641845 | -0.244158 | 5.290847  | -0.735974 | -0.285093 | 5.299420  | -0.745971 | -0.163943 | 5.160781  | -1.032433 | -0.669129 |
| 6  | 1.111212  | 2.102756  | 0.319403  | 1.123976  | 2.125866  | 0.025918  | 1.086371  | 2.133606  | 0.139629  | 1.055692  | 2.070174  | -0.500487 |
| 8  | 1.256804  | 3.235899  | 0.507856  | 1.255440  | 3.276434  | 0.036157  | 1.188434  | 3.279170  | 0.236288  | 1.204502  | 3.169727  | -0.873718 |
| 8  | 1.984699  | -0.867559 | 2.490918  | 2.048764  | -0.380794 | 2.640180  | 1.948921  | -0.517358 | 2.612164  | 2.680127  | 0.477077  | 2.438759  |
| 6  | 1.639561  | -0.363999 | 1.509869  | 1.678104  | -0.088685 | 1.585243  | 1.613018  | -0.171470 | 1.565611  | 2.011011  | 0.424580  | 1.484967  |
| 1  | 4.359884  | -2.316069 | -0.146187 | 4.488347  | -2.387905 | 0.043744  | 4.472648  | -2.406370 | 0.002279  | 4.422368  | -2.470886 | 0.285428  |
| 6  | 2.828590  | 0.684701  | -1.087711 | 2.893629  | 0.530806  | -1.107779 | 2.952349  | 0.606286  | -0.992147 | 2.642005  | 0.123395  | -1.332938 |
| 1  | 2.512415  | 0.952410  | -2.099446 | 2.611370  | 0.693455  | -2.153967 | 2.745783  | 0.849965  | -2.038522 | 2.183469  | 0.010414  | -2.327871 |
| 1  | 3.517043  | 1.418764  | -0.662708 | 3.579846  | 1.302597  | -0.744172 | 3.620620  | 1.338853  | -0.532090 | 3.380096  | 0.940599  | -1.300087 |
| 27 | 1.061413  | 0.349101  | -0.075964 | 1.099775  | 0.331961  | -0.095326 | 1.101553  | 0.344542  | -0.110338 | 1.018079  | 0.344617  | -0.027200 |
| 27 | -1.573541 | -0.208874 | 0.089706  | -1.605133 | -0.199378 | 0.107640  | -1.613994 | -0.214186 | 0.114584  | -1.532197 | -0.211699 | 0.065248  |
| 6  | -0.010639 | 0.473154  | -1.515303 | 0.054094  | 0.234242  | -1.543651 | 0.141058  | 0.342859  | -1.609216 | -0.175397 | -0.195590 | -1.395176 |
| 8  | -0.277502 | 0.675001  | -2.642468 | -0.200317 | 0.271218  | -2.692157 | -0.139174 | 0.431578  | -2.741600 | -0.225976 | -0.419378 | -2.568383 |
| 6  | -1.227507 | 0.786629  | 1.537974  | -1.301143 | 0.955908  | 1.437315  | -1.361770 | 0.891831  | 1.499860  | -0.637411 | 0.631938  | 1.432597  |
| 8  | -1.130280 | 1.412806  | 2.508824  | -1.235107 | 1.689202  | 2.332682  | -1.305463 | 1.593416  | 2.416377  | -0.633336 | 1.177809  | 2.483356  |

**Table S16.** Optimized coordinates of the 6S structure

|    | M06-L     |           |           | B3LYP*    |           |           | B3LYP     |           |           | BP86      |           |           |
|----|-----------|-----------|-----------|-----------|-----------|-----------|-----------|-----------|-----------|-----------|-----------|-----------|
|    | x         | y         | z         | x         | y         | z         | x         | y         | z         | x         | y         | z         |
| 6  | -0.897392 | 1.981735  | -1.515517 | -0.948352 | 2.034894  | -1.504797 | -0.935925 | 2.010938  | -1.511397 | -0.969635 | 2.107342  | -1.496544 |
| 1  | -0.688803 | 1.368781  | -2.397076 | -0.729427 | 1.445244  | -2.400533 | -0.707244 | 1.420735  | -2.402220 | -0.774919 | 1.519065  | -2.406246 |
| 1  | -1.975179 | 2.055532  | -1.348043 | -2.030217 | 2.075437  | -1.337058 | -2.018211 | 2.047195  | -1.357298 | -2.052309 | 2.170796  | -1.301824 |
| 6  | -0.146689 | 3.254844  | -1.385830 | -0.244892 | 3.350155  | -1.382700 | -0.246871 | 3.334767  | -1.396717 | -0.217219 | 3.394443  | -1.346101 |
| 6  | 0.533926  | 3.897216  | -2.353207 | 0.292226  | 4.090901  | -2.372541 | 0.277807  | 4.078106  | -2.388190 | 0.371367  | 4.125251  | -2.327052 |
| 1  | 1.172433  | 4.745780  | -2.122413 | 0.894951  | 4.973177  | -2.154083 | 0.869382  | 4.966780  | -2.174408 | 1.009552  | 4.984763  | -2.087876 |
| 6  | 0.898423  | 1.528829  | 1.833143  | 0.903553  | 1.567863  | 1.811800  | 0.899505  | 1.563347  | 1.825029  | 0.887509  | 1.574736  | 1.788761  |
| 8  | 1.458348  | 1.715687  | 2.827102  | 1.470980  | 1.781489  | 2.796150  | 1.459016  | 1.770759  | 2.810967  | 1.459283  | 1.803815  | 2.782149  |
| 8  | 2.319473  | 0.848758  | -1.538445 | 2.299745  | 0.932613  | -1.549238 | 2.326257  | 0.951713  | -1.524202 | 2.253897  | 0.895824  | -1.595134 |
| 6  | 1.435165  | 1.033692  | -0.817221 | 1.407030  | 1.083983  | -0.829666 | 1.427305  | 1.093456  | -0.816257 | 1.364071  | 1.062437  | -0.855430 |
| 1  | 0.469310  | 3.582548  | -3.391543 | 0.139198  | 3.830745  | -3.420545 | 0.126430  | 3.813372  | -3.433373 | 0.223487  | 3.879154  | -3.385712 |
| 6  | -0.020015 | 3.445341  | 0.070998  | -0.003478 | 3.482485  | 0.081298  | -0.005437 | 3.474219  | 0.067609  | 0.008653  | 3.504838  | 0.121768  |
| 1  | -0.932093 | 3.757571  | 0.586105  | -0.862171 | 3.829498  | 0.667267  | -0.862675 | 3.831334  | 0.646347  | -0.861122 | 3.826976  | 0.717208  |
| 1  | 0.855242  | 3.989927  | 0.431411  | 0.917830  | 3.990964  | 0.382734  | 0.912754  | 3.987614  | 0.363900  | 0.936997  | 3.997828  | 0.448988  |
| 6  | 0.897392  | -1.981735 | -1.515517 | 0.948352  | -2.034894 | -1.504797 | 0.935925  | -2.010938 | -1.511397 | 0.969635  | -2.107342 | -1.496544 |
| 1  | 0.688803  | -1.368781 | -2.397076 | 0.729427  | -1.445244 | -2.400533 | 0.707244  | -1.420735 | -2.402220 | 0.774919  | -1.519065 | -2.406246 |
| 1  | 1.975179  | -2.055532 | -1.348043 | 2.030217  | -2.075437 | -1.337058 | 2.018211  | -2.047195 | -1.357298 | 2.052309  | -2.170796 | -1.301824 |
| 6  | 0.146689  | -3.254844 | -1.385830 | 0.244892  | -3.350155 | -1.382700 | 0.246871  | -3.334767 | -1.396717 | 0.217219  | -3.394443 | -1.346101 |
| 6  | -0.533926 | -3.897216 | -2.353207 | -0.292226 | -4.090901 | -2.372541 | -0.277807 | -4.078106 | -2.388190 | -0.371367 | -4.125251 | -2.327052 |
| 1  | -1.172433 | -4.745780 | -2.122413 | -0.894951 | -4.973177 | -2.154083 | -0.869382 | -4.966780 | -2.174408 | -1.009552 | -4.984763 | -2.087876 |
| 6  | -0.898423 | -1.528829 | 1.833143  | -0.903553 | -1.567863 | 1.811800  | -0.899505 | -1.563347 | 1.825029  | -0.887509 | -1.574736 | 1.788761  |
| 8  | -1.458348 | -1.715687 | 2.827102  | -1.470980 | -1.781489 | 2.796150  | -1.459016 | -1.770759 | 2.810967  | -1.459283 | -1.803815 | 2.782149  |
| 8  | -2.319473 | -0.848758 | -1.538445 | -2.299745 | -0.932613 | -1.549238 | -2.326257 | -0.951713 | -1.524202 | -2.253897 | -0.895824 | -1.595134 |
| 6  | -1.435165 | -1.033692 | -0.817221 | -1.407030 | -1.083983 | -0.829666 | -1.427305 | -1.093456 | -0.816257 | -1.364071 | -1.062437 | -0.855430 |
| 1  | -0.469310 | -3.582548 | -3.391543 | -0.139198 | -3.830745 | -3.420545 | -0.126430 | -3.813372 | -3.433373 | -0.223487 | -3.879154 | -3.385712 |
| 6  | 0.020015  | -3.445341 | 0.070998  | 0.003478  | -3.482485 | 0.081298  | 0.005437  | -3.474219 | 0.067609  | -0.008653 | -3.504838 | 0.121768  |
| 1  | 0.932093  | -3.757571 | 0.586105  | 0.862171  | -3.829498 | 0.667267  | 0.862675  | -3.831334 | 0.646347  | 0.861122  | -3.826976 | 0.717208  |
| 1  | -0.855242 | -3.989927 | 0.431411  | -0.917830 | -3.990964 | 0.382734  | -0.912754 | -3.987614 | 0.363900  | -0.936997 | -3.997828 | 0.448988  |
| 27 | -0.020015 | -1.384741 | 0.260160  | -0.003478 | -1.413108 | 0.251268  | -0.005437 | -1.412012 | 0.250973  | 0.008653  | -1.415693 | 0.246957  |
| 27 | 0.020015  | 1.384741  | 0.260160  | 0.003478  | 1.413108  | 0.251268  | 0.005437  | 1.412012  | 0.250973  | -0.008653 | 1.415693  | 0.246957  |
| 6  | 1.641275  | -1.223093 | 0.912645  | 1.640442  | -1.291920 | 0.943716  | 1.643931  | -1.301069 | 0.941767  | 1.648842  | -1.271545 | 0.928846  |
| 8  | 2.730674  | -1.186797 | 1.304736  | 2.714547  | -1.295968 | 1.377504  | 2.716788  | -1.313703 | 1.369449  | 2.732509  | -1.257200 | 1.370752  |
| 6  | -1.641275 | 1.223093  | 0.912645  | -1.640442 | 1.291920  | 0.943716  | -1.643931 | 1.301069  | 0.941767  | -1.648842 | 1.271545  | 0.928846  |
| 8  | -2.730674 | 1.186797  | 1.304736  | -2.714547 | 1.295968  | 1.377504  | -2.716788 | 1.313703  | 1.369449  | -2.732509 | 1.257200  | 1.370752  |

**Table S17.** Harmonic vibrational frequencies (in  $\text{cm}^{-1}$ ) and infrared intensities (in parentheses, in  $\text{km/mol}$ ) for the structure **2S-1**

| M06-L   | B3LYP*  | B3LYP   | BP86    | M06-L      | B3LYP*     | B3LYP      | BP86       |
|---------|---------|---------|---------|------------|------------|------------|------------|
| 59(1)   | 60(0)   | 60(0)   | 59(0)   | 904(10)    | 891(7)     | 896(7)     | 871(6)     |
| 64(0)   | 68(1)   | 70(1)   | 60(1)   | 904(0)     | 893(1)     | 900(1)     | 871(0)     |
| 69(1)   | 72(0)   | 73(0)   | 73(1)   | 928(0)     | 946(0)     | 952(0)     | 914(0)     |
| 78(0)   | 78(0)   | 78(0)   | 81(0)   | 945(0)     | 948(0)     | 958(0)     | 914(0)     |
| 110(0)  | 113(0)  | 112(0)  | 113(0)  | 946(0)     | 949(0)     | 959(0)     | 920(0)     |
| 124(0)  | 135(0)  | 138(0)  | 126(1)  | 962(9)     | 977(6)     | 984(5)     | 946(4)     |
| 180(3)  | 174(2)  | 175(2)  | 174(3)  | 963(1)     | 979(8)     | 986(8)     | 950(9)     |
| 212(0)  | 186(0)  | 186(0)  | 191(0)  | 993(3)     | 1006(3)    | 1015(4)    | 975(2)     |
| 234(0)  | 216(0)  | 220(0)  | 208(0)  | 1028(0)    | 1019(0)    | 1028(0)    | 989(0)     |
| 236(2)  | 226(5)  | 230(5)  | 216(3)  | 1033(2)    | 1025(7)    | 1034(7)    | 996(5)     |
| 318(0)  | 279(0)  | 279(0)  | 281(1)  | 1037(0)    | 1034(0)    | 1044(0)    | 1002(0)    |
| 330(1)  | 285(0)  | 288(0)  | 283(0)  | 1041(2)    | 1036(0)    | 1045(0)    | 1006(1)    |
| 367(0)  | 373(0)  | 376(0)  | 360(0)  | 1351(1)    | 1354(3)    | 1363(3)    | 1317(1)    |
| 372(0)  | 376(15) | 378(15) | 366(0)  | 1355(8)    | 1357(0)    | 1367(0)    | 1321(9)    |
| 388(15) | 380(0)  | 384(0)  | 367(14) | 1369(0)    | 1358(4)    | 1368(2)    | 1325(0)    |
| 389(0)  | 393(0)  | 398(0)  | 376(0)  | 1375(0)    | 1363(1)    | 1372(1)    | 1331(0)    |
| 444(0)  | 435(1)  | 436(0)  | 428(2)  | 1470(13)   | 1480(12)   | 1493(11)   | 1435(18)   |
| 449(10) | 447(3)  | 449(3)  | 442(3)  | 1476(24)   | 1487(33)   | 1500(33)   | 1440(29)   |
| 451(3)  | 453(6)  | 453(3)  | 445(15) | 1477(14)   | 1492(0)    | 1505(0)    | 1447(6)    |
| 473(0)  | 465(0)  | 468(0)  | 457(0)  | 1481(0)    | 1493(12)   | 1507(12)   | 1450(0)    |
| 511(31) | 502(30) | 497(36) | 508(19) | 1494(0)    | 1496(8)    | 1509(7)    | 1453(1)    |
| 517(10) | 509(10) | 507(12) | 511(7)  | 1497(9)    | 1497(0)    | 1511(1)    | 1454(11)   |
| 524(51) | 523(0)  | 517(65) | 525(0)  | 2042(2020) | 2031(2013) | 2054(2122) | 1957(1669) |
| 532(0)  | 526(50) | 520(0)  | 534(9)  | 2053(275)  | 2041(264)  | 2065(273)  | 1967(227)  |
| 535(2)  | 533(4)  | 525(2)  | 545(35) | 3100(74)   | 3097(0)    | 3115(0)    | 3041(0)    |
| 544(10) | 533(13) | 531(7)  | 551(5)  | 3101(0)    | 3099(11)   | 3117(13)   | 3042(10)   |
| 585(0)  | 615(1)  | 621(1)  | 594(0)  | 3101(30)   | 3099(9)    | 3118(11)   | 3043(9)    |
| 631(0)  | 626(1)  | 635(1)  | 595(2)  | 3101(24)   | 3101(25)   | 3120(25)   | 3044(32)   |
| 638(1)  | 628(0)  | 637(0)  | 600(1)  | 3134(1)    | 3129(1)    | 3148(0)    | 3065(1)    |
| 654(59) | 673(51) | 680(50) | 646(55) | 3134(1)    | 3129(1)    | 3148(0)    | 3066(1)    |
| 754(1)  | 774(0)  | 779(0)  | 748(1)  | 3192(0)    | 3179(0)    | 3196(0)    | 3126(0)    |
| 766(0)  | 774(0)  | 781(1)  | 753(0)  | 3193(14)   | 3181(4)    | 3198(5)    | 3127(2)    |
| 771(1)  | 782(1)  | 789(1)  | 759(0)  | 3193(6)    | 3181(2)    | 3198(3)    | 3127(4)    |
| 771(0)  | 782(0)  | 789(0)  | 759(1)  | 3194(19)   | 3184(9)    | 3201(10)   | 3129(8)    |
| 789(4)  | 805(6)  | 814(5)  | 775(7)  | 3217(2)    | 3205(6)    | 3224(5)    | 3143(7)    |
| 806(5)  | 831(9)  | 842(10) | 795(5)  | 3217(0)    | 3206(0)    | 3224(0)    | 3143(0)    |



**Table S18.** Harmonic vibrational frequencies (in  $\text{cm}^{-1}$ ) and infrared intensities (in parentheses, in  $\text{km/mol}$ ) for the structure **2T-2**

| M06-L   | B3LYP*  | B3LYP   | BP86    | M06-L      | B3LYP*     | B3LYP      | BP86       |
|---------|---------|---------|---------|------------|------------|------------|------------|
| 44(1)   | 46(1)   | 47(0)   | 42(1)   | 863(41)    | 866(0)     | 871(0)     | 848(6)     |
| 58(0)   | 60(0)   | 60(0)   | 51(0)   | 865(0)     | 872(9)     | 878(10)    | 849(0)     |
| 62(0)   | 62(0)   | 65(0)   | 65(0)   | 892(0)     | 901(24)    | 909(25)    | 882(21)    |
| 77(0)   | 80(0)   | 80(0)   | 84(0)   | 893(0)     | 903(0)     | 910(0)     | 883(0)     |
| 102(0)  | 99(0)   | 103(0)  | 118(1)  | 964(0)     | 965(0)     | 974(0)     | 935(0)     |
| 125(1)  | 117(1)  | 117(1)  | 125(0)  | 965(1)     | 965(2)     | 975(2)     | 935(2)     |
| 157(5)  | 160(4)  | 161(4)  | 142(4)  | 1015(0)    | 1021(0)    | 1030(0)    | 987(0)     |
| 160(0)  | 164(0)  | 166(0)  | 147(0)  | 1018(21)   | 1024(8)    | 1033(9)    | 988(21)    |
| 202(0)  | 193(0)  | 193(0)  | 197(0)  | 1037(3)    | 1052(8)    | 1064(8)    | 1007(12)   |
| 220(6)  | 221(6)  | 223(5)  | 215(7)  | 1041(0)    | 1053(0)    | 1065(0)    | 1010(0)    |
| 313(0)  | 301(0)  | 302(0)  | 293(0)  | 1079(9)    | 1079(8)    | 1091(8)    | 1038(5)    |
| 323(2)  | 313(4)  | 314(5)  | 306(4)  | 1080(0)    | 1080(0)    | 1092(0)    | 1039(0)    |
| 345(1)  | 324(1)  | 325(1)  | 321(2)  | 1351(20)   | 1338(0)    | 1347(0)    | 1310(15)   |
| 367(0)  | 340(0)  | 340(0)  | 350(0)  | 1352(0)    | 1342(39)   | 1352(46)   | 1310(0)    |
| 375(0)  | 363(0)  | 363(0)  | 365(0)  | 1371(0)    | 1365(5)    | 1374(4)    | 1336(0)    |
| 389(3)  | 371(3)  | 371(4)  | 373(1)  | 1372(10)   | 1368(0)    | 1377(0)    | 1338(2)    |
| 416(0)  | 424(0)  | 425(0)  | 412(0)  | 1457(13)   | 1458(14)   | 1471(13)   | 1422(17)   |
| 426(11) | 427(5)  | 427(5)  | 416(15) | 1458(0)    | 1459(0)    | 1471(0)    | 1424(0)    |
| 454(10) | 460(14) | 463(22) | 440(9)  | 1493(0)    | 1499(0)    | 1511(0)    | 1456(0)    |
| 478(56) | 472(0)  | 473(0)  | 464(0)  | 1495(34)   | 1501(46)   | 1512(45)   | 1458(18)   |
| 479(0)  | 490(0)  | 481(0)  | 476(0)  | 1510(0)    | 1507(0)    | 1522(0)    | 1466(0)    |
| 484(0)  | 490(56) | 482(54) | 495(40) | 1510(37)   | 1507(29)   | 1522(31)   | 1468(29)   |
| 502(0)  | 508(0)  | 512(0)  | 500(0)  | 2065(2006) | 2056(1886) | 2080(1935) | 1968(1945) |
| 518(20) | 524(39) | 524(46) | 509(31) | 2078(0)    | 2065(0)    | 2089(0)    | 1986(0)    |
| 533(0)  | 528(0)  | 525(0)  | 528(21) | 3062(97)   | 3048(46)   | 3063(50)   | 3000(47)   |
| 535(27) | 529(8)  | 530(4)  | 532(0)  | 3063(0)    | 3048(0)    | 3063(0)    | 3000(0)    |
| 656(12) | 648(8)  | 651(8)  | 649(10) | 3092(0)    | 3083(5)    | 3103(0)    | 3031(7)    |
| 665(0)  | 656(0)  | 659(0)  | 654(0)  | 3092(22)   | 3083(0)    | 3103(6)    | 3032(0)    |
| 679(15) | 690(12) | 697(10) | 671(12) | 3116(34)   | 3105(0)    | 3120(0)    | 3060(0)    |
| 703(0)  | 705(0)  | 709(0)  | 692(0)  | 3117(0)    | 3105(21)   | 3120(24)   | 3060(8)    |
| 723(22) | 726(25) | 728(25) | 720(3)  | 3133(0)    | 3109(7)    | 3127(9)    | 3063(0)    |
| 723(0)  | 728(0)  | 730(0)  | 725(0)  | 3133(35)   | 3110(0)    | 3127(0)    | 3063(16)   |
| 755(9)  | 758(8)  | 765(10) | 752(2)  | 3206(8)    | 3188(9)    | 3206(13)   | 3156(0)    |
| 768(0)  | 770(0)  | 777(0)  | 757(0)  | 3207(0)    | 3189(0)    | 3207(0)    | 3156(8)    |
| 846(0)  | 850(33) | 853(33) | 837(0)  | 3218(0)    | 3207(0)    | 3225(0)    | 3158(0)    |
| 853(8)  | 850(0)  | 854(0)  | 839(35) | 3218(26)   | 3208(9)    | 3225(10)   | 3160(0)    |

**Table S19.** Harmonic vibrational frequencies (in  $\text{cm}^{-1}$ ) and infrared intensities (in parentheses, in  $\text{km/mol}$ ) for the structure **2S-3**

| M06-L   | B3LYP*  | B3LYP   | BP86    | M06-L      | B3LYP*     | B3LYP      | BP86      |
|---------|---------|---------|---------|------------|------------|------------|-----------|
| 53(0)   | 45(0)   | 42(0)   | 51(0)   | 904(0)     | 918(0)     | 927(0)     | 887(0)    |
| 58(2)   | 56(2)   | 53(0)   | 55(2)   | 905(3)     | 919(2)     | 927(3)     | 888(1)    |
| 66(0)   | 60(0)   | 55(2)   | 71(0)   | 918(1)     | 926(14)    | 937(15)    | 893(10)   |
| 102(0)  | 102(0)  | 101(0)  | 103(0)  | 921(8)     | 927(13)    | 938(13)    | 894(10)   |
| 124(1)  | 123(1)  | 113(11) | 121(1)  | 948(0)     | 950(0)     | 960(0)     | 920(0)    |
| 145(2)  | 135(5)  | 124(1)  | 143(2)  | 948(0)     | 951(0)     | 960(0)     | 921(0)    |
| 160(0)  | 163(0)  | 166(0)  | 159(0)  | 1012(29)   | 997(14)    | 1005(16)   | 971(14)   |
| 209(1)  | 206(2)  | 189(9)  | 208(0)  | 1015(0)    | 1000(0)    | 1009(0)    | 973(0)    |
| 230(0)  | 221(0)  | 210(1)  | 222(0)  | 1037(0)    | 1030(0)    | 1040(0)    | 1002(0)   |
| 251(0)  | 229(16) | 220(0)  | 243(0)  | 1040(1)    | 1034(0)    | 1043(0)    | 1006(0)   |
| 297(13) | 239(0)  | 237(0)  | 303(4)  | 1040(0)    | 1035(0)    | 1045(0)    | 1006(0)   |
| 341(3)  | 305(6)  | 308(7)  | 311(22) | 1041(3)    | 1036(2)    | 1046(2)    | 1007(1)   |
| 357(0)  | 321(0)  | 315(0)  | 327(2)  | 1370(0)    | 1368(0)    | 1377(0)    | 1334(0)   |
| 366(0)  | 326(3)  | 327(3)  | 340(0)  | 1370(0)    | 1368(0)    | 1378(0)    | 1334(1)   |
| 366(1)  | 374(11) | 371(14) | 365(0)  | 1374(2)    | 1370(3)    | 1379(3)    | 1337(2)   |
| 398(0)  | 374(1)  | 376(2)  | 381(2)  | 1374(0)    | 1371(1)    | 1380(1)    | 1338(0)   |
| 402(1)  | 390(3)  | 388(3)  | 390(1)  | 1486(0)    | 1490(2)    | 1504(2)    | 1448(3)   |
| 407(2)  | 396(0)  | 392(0)  | 392(0)  | 1488(7)    | 1492(18)   | 1505(19)   | 1450(15)  |
| 419(0)  | 397(0)  | 400(0)  | 406(0)  | 1497(0)    | 1499(0)    | 1513(0)    | 1457(0)   |
| 421(0)  | 410(0)  | 414(0)  | 413(0)  | 1497(9)    | 1500(14)   | 1513(15)   | 1458(12)  |
| 425(17) | 429(8)  | 433(9)  | 414(7)  | 1500(4)    | 1508(2)    | 1521(2)    | 1467(2)   |
| 435(3)  | 439(1)  | 443(1)  | 426(1)  | 1501(12)   | 1508(6)    | 1521(5)    | 1467(6)   |
| 450(0)  | 452(0)  | 453(1)  | 442(0)  | 1932(1044) | 1917(1046) | 1942(1108) | 1841(871) |
| 495(0)  | 486(0)  | 484(0)  | 492(0)  | 1950(168)  | 1934(173)  | 1960(174)  | 1858(152) |
| 500(18) | 490(18) | 484(19) | 502(13) | 3128(0)    | 3129(0)    | 3147(0)    | 3073(1)   |
| 537(9)  | 534(10) | 532(12) | 532(6)  | 3128(35)   | 3129(6)    | 3147(7)    | 3073(7)   |
| 694(0)  | 694(0)  | 702(0)  | 669(0)  | 3128(14)   | 3129(1)    | 3148(1)    | 3074(0)   |
| 709(0)  | 707(0)  | 714(0)  | 683(0)  | 3129(18)   | 3129(5)    | 3148(6)    | 3074(7)   |
| 758(2)  | 756(12) | 765(21) | 727(0)  | 3133(6)    | 3135(0)    | 3154(0)    | 3079(0)   |
| 760(0)  | 761(0)  | 772(0)  | 731(0)  | 3133(16)   | 3135(0)    | 3154(1)    | 3079(0)   |
| 771(1)  | 765(1)  | 773(1)  | 736(1)  | 3233(3)    | 3227(0)    | 3245(0)    | 3172(0)   |
| 772(3)  | 765(9)  | 775(4)  | 742(12) | 3234(0)    | 3227(0)    | 3245(0)    | 3172(1)   |
| 785(29) | 771(0)  | 781(0)  | 742(2)  | 3234(9)    | 3230(0)    | 3248(1)    | 3175(0)   |
| 790(2)  | 772(3)  | 782(3)  | 748(1)  | 3234(26)   | 3230(1)    | 3248(0)    | 3175(5)   |
| 846(0)  | 855(1)  | 863(1)  | 827(0)  | 3235(0)    | 3231(6)    | 3249(8)    | 3176(1)   |
| 854(21) | 865(13) | 874(15) | 839(10) | 3236(15)   | 3231(6)    | 3249(7)    | 3176(7)   |

**Table S20.** Harmonic vibrational frequencies (in  $\text{cm}^{-1}$ ) and infrared intensities (in parentheses, in  $\text{km/mol}$ ) for the structure **2T-4**

| M06-L   | B3LYP*  | B3LYP   | BP86    | M06-L      | B3LYP*    | B3LYP      | BP86      |
|---------|---------|---------|---------|------------|-----------|------------|-----------|
| 27(1)   | 32(1)   | 30(1)   | 32(0)   | 869(0)     | 883(0)    | 884(15)    | 852(1)    |
| 34(0)   | 38(0)   | 44(0)   | 36(2)   | 875(30)    | 885(30)   | 889(0)     | 858(25)   |
| 44(0)   | 41(0)   | 48(0)   | 43(0)   | 904(0)     | 909(8)    | 916(7)     | 873(8)    |
| 80(0)   | 89(0)   | 89(0)   | 88(0)   | 910(5)     | 913(7)    | 918(17)    | 881(1)    |
| 110(0)  | 108(1)  | 108(0)  | 109(1)  | 950(0)     | 950(0)    | 959(0)     | 919(0)    |
| 143(0)  | 133(0)  | 137(0)  | 122(0)  | 950(0)     | 950(0)    | 959(0)     | 920(0)    |
| 147(0)  | 148(0)  | 141(0)  | 151(0)  | 1005(44)   | 986(33)   | 988(36)    | 965(14)   |
| 204(1)  | 200(0)  | 196(0)  | 206(2)  | 1010(0)    | 991(0)    | 992(0)     | 969(0)    |
| 214(0)  | 205(0)  | 199(1)  | 206(0)  | 1038(1)    | 1031(0)   | 1040(1)    | 1002(0)   |
| 227(0)  | 234(0)  | 202(0)  | 253(0)  | 1039(3)    | 1032(1)   | 1040(1)    | 1004(0)   |
| 304(0)  | 252(2)  | 223(2)  | 270(9)  | 1040(1)    | 1033(1)   | 1041(2)    | 1005(0)   |
| 305(0)  | 279(0)  | 275(1)  | 299(0)  | 1041(0)    | 1034(0)   | 1042(0)    | 1006(0)   |
| 328(5)  | 285(10) | 287(0)  | 303(0)  | 1363(5)    | 1356(6)   | 1364(21)   | 1323(2)   |
| 356(0)  | 316(1)  | 295(7)  | 331(2)  | 1365(0)    | 1358(0)   | 1368(1)    | 1325(0)   |
| 373(0)  | 361(0)  | 334(17) | 365(0)  | 1376(0)    | 1373(0)   | 1380(2)    | 1342(0)   |
| 375(0)  | 368(0)  | 348(0)  | 365(0)  | 1376(0)    | 1373(0)   | 1381(0)    | 1342(0)   |
| 393(16) | 369(22) | 359(0)  | 388(0)  | 1486(6)    | 1488(6)   | 1500(15)   | 1446(5)   |
| 399(5)  | 383(1)  | 382(3)  | 394(0)  | 1488(10)   | 1490(18)  | 1502(21)   | 1448(11)  |
| 400(2)  | 403(0)  | 402(0)  | 403(0)  | 1496(5)    | 1500(0)   | 1511(43)   | 1461(0)   |
| 425(0)  | 423(0)  | 425(0)  | 413(0)  | 1496(2)    | 1500(36)  | 1511(0)    | 1462(28)  |
| 431(2)  | 426(15) | 426(16) | 417(0)  | 1500(0)    | 1504(3)   | 1517(4)    | 1464(1)   |
| 431(0)  | 427(0)  | 430(0)  | 422(1)  | 1500(30)   | 1505(1)   | 1517(1)    | 1464(1)   |
| 433(25) | 433(1)  | 435(1)  | 452(20) | 1906(1013) | 1881(997) | 1912(1066) | 1805(805) |
| 465(10) | 454(3)  | 452(14) | 462(3)  | 1921(11)   | 1898(5)   | 1934(0)    | 1822(31)  |
| 465(8)  | 463(12) | 452(2)  | 477(3)  | 3122(0)    | 3124(3)   | 3141(4)    | 3069(0)   |
| 475(3)  | 472(7)  | 470(12) | 482(6)  | 3122(41)   | 3124(0)   | 3141(0)    | 3069(11)  |
| 709(2)  | 704(3)  | 704(1)  | 679(4)  | 3125(28)   | 3125(1)   | 3144(1)    | 3072(4)   |
| 712(0)  | 707(0)  | 707(0)  | 679(0)  | 3125(0)    | 3125(9)   | 3145(9)    | 3072(0)   |
| 747(15) | 744(14) | 747(18) | 709(8)  | 3127(23)   | 3131(0)   | 3151(0)    | 3076(1)   |
| 756(0)  | 748(55) | 755(0)  | 715(24) | 3127(3)    | 3131(0)   | 3151(1)    | 3077(1)   |
| 756(44) | 750(0)  | 756(77) | 716(0)  | 3228(20)   | 3225(0)   | 3242(0)    | 3169(0)   |
| 769(1)  | 757(0)  | 762(0)  | 729(0)  | 3228(0)    | 3225(0)   | 3242(2)    | 3169(3)   |
| 792(30) | 770(5)  | 776(1)  | 745(5)  | 3231(0)    | 3228(0)   | 3245(0)    | 3175(0)   |
| 795(1)  | 775(1)  | 783(2)  | 749(0)  | 3231(0)    | 3228(8)   | 3245(9)    | 3175(5)   |
| 867(12) | 876(0)  | 870(0)  | 848(4)  | 3232(10)   | 3228(0)   | 3250(0)    | 3176(0)   |
| 867(0)  | 880(10) | 882(23) | 849(0)  | 3232(27)   | 3229(7)   | 3250(8)    | 3177(7)   |

**Table S21.** Harmonic vibrational frequencies (in  $\text{cm}^{-1}$ ) and infrared intensities (in parentheses, in  $\text{km/mol}$ ) for the structure **3S-1**

| M06-L   | B3LYP*   | B3LYP    | BP86     | M06-L     | B3LYP*    | B3LYP      | BP86      |
|---------|----------|----------|----------|-----------|-----------|------------|-----------|
| 52(1)   | 27(0)    | 25(0)    | 35(0)    | 854(6)    | 866(10)   | 874(12)    | 831(2)    |
| 63(0)   | 47(1)    | 46(0)    | 47(1)    | 858(4)    | 871(5)    | 881(3)     | 842(10)   |
| 67(1)   | 61(1)    | 61(0)    | 57(2)    | 903(5)    | 918(2)    | 925(2)     | 890(3)    |
| 90(4)   | 88(0)    | 87(0)    | 81(3)    | 909(9)    | 921(11)   | 928(14)    | 894(5)    |
| 91(0)   | 89(2)    | 90(2)    | 83(0)    | 920(4)    | 925(10)   | 934(10)    | 896(10)   |
| 105(0)  | 91(0)    | 93(0)    | 92(0)    | 934(11)   | 937(21)   | 947(22)    | 907(16)   |
| 118(0)  | 110(0)   | 110(0)   | 109(0)   | 952(0)    | 951(0)    | 960(0)     | 922(0)    |
| 118(0)  | 111(0)   | 111(0)   | 111(0)   | 957(0)    | 955(0)    | 964(0)     | 927(0)    |
| 126(3)  | 128(0)   | 128(3)   | 127(3)   | 1001(8)   | 986(2)    | 993(3)     | 964(2)    |
| 127(0)  | 128(3)   | 129(1)   | 127(0)   | 1014(8)   | 1000(3)   | 1008(4)    | 975(3)    |
| 143(1)  | 139(1)   | 138(2)   | 142(1)   | 1038(0)   | 1030(0)   | 1039(0)    | 1002(0)   |
| 181(1)  | 170(2)   | 169(2)   | 174(1)   | 1043(1)   | 1034(0)   | 1042(0)    | 1008(0)   |
| 326(2)  | 289(4)   | 293(4)   | 277(4)   | 1045(1)   | 1039(1)   | 1047(1)    | 1010(1)   |
| 347(2)  | 310(3)   | 311(4)   | 310(2)   | 1047(1)   | 1039(1)   | 1048(1)    | 1012(0)   |
| 354(3)  | 328(2)   | 331(2)   | 321(2)   | 1353(0)   | 1345(0)   | 1355(0)    | 1312(0)   |
| 363(0)  | 349(1)   | 351(1)   | 341(0)   | 1370(0)   | 1366(0)   | 1375(0)    | 1336(1)   |
| 375(2)  | 369(4)   | 372(3)   | 361(2)   | 1380(1)   | 1377(3)   | 1386(3)    | 1346(2)   |
| 384(3)  | 386(2)   | 390(2)   | 364(5)   | 1383(0)   | 1383(1)   | 1392(1)    | 1352(0)   |
| 418(10) | 401(6)   | 404(6)   | 394(7)   | 1480(8)   | 1484(11)  | 1498(11)   | 1442(9)   |
| 425(37) | 427(31)  | 429(35)  | 414(32)  | 1491(1)   | 1499(10)  | 1512(10)   | 1459(8)   |
| 428(6)  | 428(1)   | 432(1)   | 417(1)   | 1494(5)   | 1503(0)   | 1516(1)    | 1461(0)   |
| 434(3)  | 434(9)   | 436(9)   | 420(4)   | 1495(7)   | 1504(27)  | 1517(30)   | 1464(24)  |
| 437(0)  | 444(1)   | 448(1)   | 426(1)   | 1505(21)  | 1506(8)   | 1518(4)    | 1467(1)   |
| 460(3)  | 459(7)   | 461(7)   | 452(6)   | 1506(7)   | 1508(0)   | 1521(0)    | 1468(11)  |
| 481(79) | 487(3)   | 484(4)   | 483(134) | 2017(820) | 2014(750) | 2035(782)  | 1938(689) |
| 494(33) | 490(119) | 488(108) | 490(7)   | 2023(745) | 2017(962) | 2040(1065) | 1946(647) |
| 505(1)  | 501(13)  | 500(12)  | 494(3)   | 2056(70)  | 2046(40)  | 2068(12)   | 1977(101) |
| 517(22) | 535(15)  | 532(1)   | 530(33)  | 3114(20)  | 3116(4)   | 3135(5)    | 3059(5)   |
| 524(15) | 541(20)  | 538(22)  | 541(29)  | 3115(12)  | 3119(2)   | 3138(2)    | 3062(2)   |
| 540(91) | 542(61)  | 541(90)  | 542(13)  | 3128(28)  | 3135(8)   | 3153(10)   | 3078(8)   |
| 549(29) | 553(37)  | 554(37)  | 561(18)  | 3128(14)  | 3135(3)   | 3154(3)    | 3079(3)   |
| 730(6)  | 729(4)   | 737(4)   | 700(5)   | 3133(11)  | 3137(2)   | 3155(2)    | 3082(2)   |
| 734(0)  | 731(0)   | 738(0)   | 712(0)   | 3139(22)  | 3141(3)   | 3159(4)    | 3085(4)   |
| 762(19) | 750(9)   | 760(9)   | 719(12)  | 3225(1)   | 3218(0)   | 3236(0)    | 3162(0)   |
| 768(0)  | 768(2)   | 778(0)   | 740(0)   | 3225(24)  | 3221(8)   | 3240(8)    | 3165(9)   |
| 785(1)  | 768(0)   | 778(2)   | 743(2)   | 3236(9)   | 3233(1)   | 3251(0)    | 3180(1)   |
| 789(7)  | 772(8)   | 778(10)  | 754(6)   | 3236(7)   | 3234(0)   | 3251(2)    | 3180(2)   |
| 798(15) | 800(8)   | 809(8)   | 770(10)  | 3238(6)   | 3237(3)   | 3254(4)    | 3182(2)   |
| 801(2)  | 806(1)   | 814(0)   | 780(1)   | 3243(10)  | 3238(5)   | 3255(5)    | 3183(4)   |

**Table S22.** Harmonic vibrational frequencies (in  $\text{cm}^{-1}$ ) and infrared intensities (in parentheses, in  $\text{km/mol}$ ) for the structure **3S-2**

| M06-L    | B3LYP*   | B3LYP    | BP86     | M06-L     | B3LYP*    | B3LYP     | BP86      |
|----------|----------|----------|----------|-----------|-----------|-----------|-----------|
| 28(1)    | 36(1)    | 37(1)    | 35(1)    | 841(8)    | 856(6)    | 864(7)    | 827(5)    |
| 56(0)    | 54(0)    | 55(0)    | 49(0)    | 864(3)    | 878(2)    | 887(2)    | 847(2)    |
| 80(0)    | 72(0)    | 71(0)    | 70(0)    | 884(18)   | 891(24)   | 901(25)   | 859(19)   |
| 82(0)    | 88(0)    | 87(0)    | 81(0)    | 889(8)    | 897(18)   | 907(17)   | 865(19)   |
| 92(0)    | 89(0)    | 90(0)    | 88(0)    | 926(5)    | 930(7)    | 938(9)    | 901(4)    |
| 100(1)   | 96(0)    | 97(0)    | 101(1)   | 944(5)    | 947(7)    | 955(8)    | 920(6)    |
| 105(1)   | 109(1)   | 111(1)   | 105(0)   | 951(0)    | 952(0)    | 960(0)    | 923(0)    |
| 116(1)   | 122(1)   | 122(2)   | 122(1)   | 955(0)    | 956(0)    | 964(0)    | 927(0)    |
| 156(1)   | 155(1)   | 156(1)   | 153(1)   | 1004(5)   | 991(1)    | 998(1)    | 966(1)    |
| 211(0)   | 203(0)   | 201(0)   | 206(0)   | 1017(3)   | 1000(0)   | 1007(1)   | 977(1)    |
| 232(1)   | 233(0)   | 234(0)   | 230(1)   | 1038(2)   | 1030(1)   | 1039(1)   | 1004(0)   |
| 246(0)   | 239(0)   | 237(0)   | 243(0)   | 1040(1)   | 1036(0)   | 1045(0)   | 1008(1)   |
| 307(7)   | 262(11)  | 266(12)  | 254(7)   | 1042(0)   | 1036(0)   | 1045(0)   | 1010(0)   |
| 332(2)   | 293(4)   | 296(5)   | 288(3)   | 1043(0)   | 1037(0)   | 1046(0)   | 1011(0)   |
| 351(5)   | 319(7)   | 321(8)   | 314(5)   | 1354(0)   | 1346(0)   | 1355(0)   | 1317(0)   |
| 369(6)   | 343(8)   | 346(9)   | 337(6)   | 1372(1)   | 1370(2)   | 1380(1)   | 1338(3)   |
| 379(0)   | 380(0)   | 381(0)   | 368(1)   | 1378(0)   | 1373(1)   | 1382(1)   | 1343(0)   |
| 400(2)   | 388(1)   | 391(2)   | 379(1)   | 1385(0)   | 1383(1)   | 1393(1)   | 1352(0)   |
| 404(5)   | 403(12)  | 405(14)  | 396(6)   | 1482(4)   | 1486(6)   | 1499(7)   | 1446(5)   |
| 419(0)   | 419(2)   | 421(2)   | 408(2)   | 1493(0)   | 1498(28)  | 1510(27)  | 1459(26)  |
| 425(8)   | 428(2)   | 431(2)   | 416(3)   | 1496(1)   | 1502(7)   | 1515(8)   | 1462(5)   |
| 426(3)   | 429(1)   | 432(1)   | 416(4)   | 1498(22)  | 1503(0)   | 1515(30)  | 1463(0)   |
| 442(6)   | 437(8)   | 437(6)   | 437(14)  | 1501(4)   | 1504(29)  | 1517(0)   | 1466(23)  |
| 461(4)   | 459(3)   | 458(2)   | 459(4)   | 1506(25)  | 1508(1)   | 1521(1)   | 1468(1)   |
| 477(1)   | 461(7)   | 462(8)   | 461(1)   | 1890(861) | 1861(879) | 1875(947) | 1809(733) |
| 479(19)  | 473(1)   | 473(1)   | 476(2)   | 1933(52)  | 1913(52)  | 1933(51)  | 1848(52)  |
| 488(8)   | 488(1)   | 485(7)   | 485(3)   | 2079(776) | 2063(734) | 2086(768) | 1993(633) |
| 498(5)   | 498(14)  | 497(11)  | 505(6)   | 3109(19)  | 3118(5)   | 3137(1)   | 3062(6)   |
| 527(15)  | 518(18)  | 518(19)  | 515(13)  | 3121(10)  | 3119(1)   | 3137(6)   | 3066(1)   |
| 543(32)  | 540(37)  | 538(37)  | 541(34)  | 3122(12)  | 3126(1)   | 3144(1)   | 3071(2)   |
| 637(446) | 631(479) | 628(504) | 632(388) | 3124(19)  | 3130(3)   | 3149(4)   | 3074(4)   |
| 709(16)  | 703(12)  | 713(12)  | 675(14)  | 3132(16)  | 3135(2)   | 3153(3)   | 3080(3)   |
| 734(1)   | 729(1)   | 738(1)   | 702(1)   | 3134(21)  | 3140(2)   | 3158(3)   | 3084(3)   |
| 765(13)  | 752(14)  | 762(15)  | 726(15)  | 3216(11)  | 3219(2)   | 3237(2)   | 3164(2)   |
| 774(3)   | 761(2)   | 771(2)   | 733(2)   | 3229(6)   | 3227(3)   | 3245(3)   | 3173(2)   |
| 791(9)   | 771(15)  | 778(15)  | 752(13)  | 3232(7)   | 3229(3)   | 3247(3)   | 3175(3)   |
| 801(19)  | 785(3)   | 793(3)   | 763(5)   | 3233(11)  | 3230(2)   | 3248(2)   | 3176(2)   |
| 802(2)   | 793(3)   | 802(2)   | 763(3)   | 3241(13)  | 3237(1)   | 3255(1)   | 3183(0)   |
| 804(5)   | 794(4)   | 804(4)   | 769(4)   | 3241(2)   | 3239(4)   | 3257(4)   | 3185(4)   |

**Table S23.** Harmonic vibrational frequencies (in  $\text{cm}^{-1}$ ) and infrared intensities (in parentheses, in  $\text{km/mol}$ ) for the structure **3T-3**

| M06-L   | B3LYP*  | B3LYP   | BP86     | M06-L     | B3LYP*    | B3LYP     | BP86      |
|---------|---------|---------|----------|-----------|-----------|-----------|-----------|
| 72(1)   | 56(0)   | 4(0)    | 62(0)    | 864(0)    | 879(0)    | 891(0)    | 848(0)    |
| 72(1)   | 56(0)   | 4(0)    | 68(0)    | 864(0)    | 879(0)    | 891(0)    | 848(0)    |
| 75(0)   | 72(1)   | 74(1)   | 71(1)    | 870(18)   | 885(16)   | 897(21)   | 853(9)    |
| 82(0)   | 72(1)   | 74(1)   | 71(1)    | 870(18)   | 885(16)   | 897(21)   | 853(9)    |
| 82(0)   | 81(0)   | 93(0)   | 99(0)    | 898(0)    | 904(6)    | 918(4)    | 869(11)   |
| 83(0)   | 82(0)   | 95(0)   | 99(0)    | 899(0)    | 905(0)    | 918(0)    | 870(0)    |
| 98(0)   | 102(0)  | 105(0)  | 100(0)   | 956(0)    | 955(0)    | 963(0)    | 926(0)    |
| 98(0)   | 102(0)  | 105(0)  | 100(0)   | 956(0)    | 955(0)    | 963(0)    | 926(0)    |
| 146(0)  | 136(0)  | 136(0)  | 150(0)   | 1002(43)  | 984(27)   | 991(39)   | 963(15)   |
| 146(0)  | 136(0)  | 137(0)  | 150(0)   | 1005(0)   | 987(0)    | 994(0)    | 965(0)    |
| 174(1)  | 173(1)  | 170(1)  | 177(1)   | 1043(0)   | 1035(0)   | 1043(0)   | 1009(0)   |
| 238(0)  | 226(0)  | 226(0)  | 227(0)   | 1043(0)   | 1035(0)   | 1043(0)   | 1009(0)   |
| 319(0)  | 290(0)  | 296(0)  | 284(0)   | 1045(1)   | 1036(0)   | 1045(1)   | 1010(0)   |
| 319(0)  | 290(0)  | 296(0)  | 284(0)   | 1045(1)   | 1036(0)   | 1045(1)   | 1010(0)   |
| 335(2)  | 298(7)  | 307(7)  | 287(6)   | 1374(0)   | 1369(0)   | 1378(1)   | 1340(0)   |
| 335(2)  | 298(7)  | 307(7)  | 287(6)   | 1374(0)   | 1369(0)   | 1378(1)   | 1340(0)   |
| 354(0)  | 338(0)  | 339(0)  | 341(0)   | 1374(0)   | 1369(0)   | 1378(0)   | 1340(0)   |
| 354(0)  | 338(0)  | 339(0)  | 341(0)   | 1374(0)   | 1369(0)   | 1378(0)   | 1340(0)   |
| 390(0)  | 368(9)  | 370(0)  | 352(3)   | 1495(1)   | 1496(0)   | 1509(0)   | 1459(0)   |
| 393(16) | 379(0)  | 379(15) | 389(0)   | 1495(0)   | 1496(0)   | 1509(0)   | 1459(0)   |
| 417(0)  | 413(6)  | 412(8)  | 407(2)   | 1497(0)   | 1497(34)  | 1509(35)  | 1460(32)  |
| 417(5)  | 413(6)  | 412(8)  | 407(2)   | 1497(0)   | 1497(34)  | 1509(35)  | 1460(32)  |
| 417(5)  | 415(0)  | 415(0)  | 409(0)   | 1497(29)  | 1505(1)   | 1519(1)   | 1465(0)   |
| 420(0)  | 425(0)  | 429(0)  | 413(0)   | 1497(29)  | 1505(0)   | 1519(0)   | 1465(0)   |
| 421(0)  | 425(0)  | 429(0)  | 413(0)   | 1965(850) | 1938(835) | 1960(897) | 1868(703) |
| 445(4)  | 441(4)  | 441(76) | 445(4)   | 1965(849) | 1938(835) | 1960(897) | 1868(703) |
| 445(4)  | 441(4)  | 443(3)  | 445(4)   | 1995(0)   | 1965(0)   | 1982(0)   | 1900(0)   |
| 481(0)  | 459(87) | 443(3)  | 476(0)   | 3126(0)   | 3129(0)   | 3148(0)   | 3076(0)   |
| 482(94) | 466(0)  | 465(0)  | 497(105) | 3126(0)   | 3129(0)   | 3148(0)   | 3076(0)   |
| 516(27) | 513(25) | 509(26) | 517(22)  | 3126(39)  | 3130(7)   | 3148(8)   | 3076(9)   |
| 516(27) | 513(25) | 509(26) | 517(22)  | 3126(39)  | 3130(7)   | 3148(8)   | 3076(9)   |
| 718(0)  | 716(0)  | 731(0)  | 687(0)   | 3128(24)  | 3135(0)   | 3154(1)   | 3080(1)   |
| 722(0)  | 717(0)  | 732(0)  | 689(0)   | 3129(0)   | 3135(0)   | 3155(0)   | 3081(0)   |
| 772(0)  | 766(0)  | 774(47) | 736(0)   | 3234(0)   | 3229(0)   | 3247(0)   | 3177(0)   |
| 772(0)  | 766(0)  | 780(0)  | 736(0)   | 3234(0)   | 3229(0)   | 3247(0)   | 3177(0)   |
| 773(4)  | 767(33) | 781(0)  | 736(4)   | 3234(25)  | 3232(0)   | 3251(0)   | 3180(0)   |
| 773(4)  | 767(5)  | 781(0)  | 736(4)   | 3234(25)  | 3232(0)   | 3251(0)   | 3180(0)   |
| 791(57) | 767(5)  | 782(5)  | 746(22)  | 3234(0)   | 3233(7)   | 3251(8)   | 3180(7)   |
| 796(0)  | 771(0)  | 782(5)  | 750(0)   | 3234(0)   | 3233(7)   | 3251(8)   | 3180(7)   |

**Table S24.** Harmonic vibrational frequencies (in  $\text{cm}^{-1}$ ) and infrared intensities (in parentheses, in  $\text{km/mol}$ ) for the structure **4S-1**

| M06-L    | B3LYP*   | B3LYP    | BP86     | M06-L      | B3LYP*     | B3LYP      | BP86       |
|----------|----------|----------|----------|------------|------------|------------|------------|
| 48(1)    | 48(1)    | 48(1)    | 48(1)    | 806(18)    | 797(6)     | 806(5)     | 774(9)     |
| 54(0)    | 52(0)    | 52(0)    | 51(1)    | 807(0)     | 798(0)     | 807(0)     | 774(0)     |
| 70(0)    | 76(0)    | 76(0)    | 73(0)    | 874(7)     | 887(4)     | 896(5)     | 859(3)     |
| 83(0)    | 82(0)    | 83(0)    | 78(0)    | 877(0)     | 889(0)     | 898(0)     | 861(0)     |
| 83(0)    | 84(0)    | 86(0)    | 79(0)    | 894(0)     | 903(0)     | 912(0)     | 873(0)     |
| 84(0)    | 87(0)    | 88(0)    | 86(0)    | 896(9)     | 904(22)    | 913(21)    | 874(21)    |
| 86(0)    | 89(0)    | 90(0)    | 87(0)    | 921(0)     | 924(0)     | 932(0)     | 896(0)     |
| 117(0)   | 114(0)   | 108(0)   | 119(1)   | 924(23)    | 926(35)    | 935(36)    | 899(31)    |
| 120(1)   | 121(1)   | 122(1)   | 128(1)   | 954(0)     | 954(0)     | 963(0)     | 926(0)     |
| 123(0)   | 131(0)   | 132(0)   | 128(0)   | 955(0)     | 954(0)     | 963(0)     | 926(0)     |
| 150(0)   | 154(0)   | 155(0)   | 151(0)   | 1009(6)    | 993(0)     | 1001(0)    | 970(1)     |
| 220(0)   | 214(0)   | 213(0)   | 215(0)   | 1009(0)    | 994(0)     | 1001(0)    | 970(0)     |
| 229(0)   | 234(0)   | 234(0)   | 231(0)   | 1043(0)    | 1036(0)    | 1045(0)    | 1009(0)    |
| 243(0)   | 239(0)   | 236(0)   | 245(0)   | 1044(0)    | 1037(0)    | 1046(0)    | 1010(0)    |
| 337(9)   | 299(14)  | 303(15)  | 292(10)  | 1044(3)    | 1038(1)    | 1046(1)    | 1011(1)    |
| 347(0)   | 309(0)   | 309(0)   | 305(8)   | 1044(0)    | 1038(0)    | 1046(0)    | 1011(0)    |
| 350(7)   | 310(9)   | 312(9)   | 310(0)   | 1375(2)    | 1372(1)    | 1381(2)    | 1342(0)    |
| 354(0)   | 317(0)   | 319(0)   | 312(0)   | 1376(0)    | 1373(0)    | 1381(0)    | 1343(0)    |
| 373(0)   | 366(0)   | 366(0)   | 367(0)   | 1378(0)    | 1374(3)    | 1383(3)    | 1343(5)    |
| 394(1)   | 382(2)   | 385(2)   | 373(3)   | 1378(0)    | 1375(0)    | 1384(0)    | 1343(0)    |
| 395(0)   | 392(0)   | 392(2)   | 386(0)   | 1498(2)    | 1500(46)   | 1512(46)   | 1461(42)   |
| 400(0)   | 394(1)   | 393(0)   | 392(0)   | 1498(0)    | 1500(0)    | 1512(0)    | 1462(0)    |
| 423(0)   | 422(0)   | 422(0)   | 413(4)   | 1501(36)   | 1505(10)   | 1518(12)   | 1466(7)    |
| 423(6)   | 427(4)   | 430(5)   | 414(0)   | 1501(0)    | 1506(0)    | 1518(0)    | 1466(0)    |
| 424(0)   | 429(0)   | 433(0)   | 414(0)   | 1506(4)    | 1510(0)    | 1523(0)    | 1470(1)    |
| 433(0)   | 431(0)   | 433(0)   | 430(0)   | 1507(0)    | 1510(1)    | 1523(1)    | 1470(0)    |
| 440(0)   | 443(0)   | 445(0)   | 438(0)   | 1910(914)  | 1875(933)  | 1888(1008) | 1826(768)  |
| 460(14)  | 461(10)  | 456(15)  | 470(1)   | 1949(0)    | 1925(0)    | 1945(0)    | 1862(0)    |
| 481(0)   | 484(0)   | 482(0)   | 481(0)   | 2077(1395) | 2064(1363) | 2087(1402) | 1990(1220) |
| 491(0)   | 490(0)   | 485(0)   | 504(31)  | 2089(0)    | 2074(0)    | 2097(0)    | 2002(0)    |
| 501(42)  | 499(35)  | 497(32)  | 507(0)   | 3120(23)   | 3128(5)    | 3146(6)    | 3075(5)    |
| 518(0)   | 511(0)   | 510(0)   | 514(54)  | 3120(0)    | 3128(0)    | 3146(0)    | 3075(0)    |
| 520(62)  | 515(62)  | 514(65)  | 515(0)   | 3134(0)    | 3135(5)    | 3153(7)    | 3081(6)    |
| 543(34)  | 544(42)  | 543(41)  | 544(42)  | 3134(35)   | 3135(0)    | 3153(0)    | 3081(0)    |
| 557(0)   | 552(0)   | 552(0)   | 550(0)   | 3136(38)   | 3140(3)    | 3158(5)    | 3084(4)    |
| 618(491) | 613(530) | 611(542) | 619(480) | 3136(0)    | 3140(0)    | 3158(0)    | 3085(0)    |
| 742(0)   | 734(1)   | 742(1)   | 711(0)   | 3226(0)    | 3227(3)    | 3245(3)    | 3176(3)    |
| 743(0)   | 736(0)   | 744(0)   | 712(0)   | 3226(16)   | 3227(0)    | 3245(0)    | 3176(0)    |
| 790(0)   | 769(0)   | 775(0)   | 750(0)   | 3241(27)   | 3236(0)    | 3253(0)    | 3183(0)    |
| 792(15)  | 770(18)  | 777(20)  | 752(15)  | 3241(0)    | 3236(1)    | 3253(2)    | 3183(1)    |
| 799(0)   | 791(0)   | 801(0)   | 764(0)   | 3241(0)    | 3238(8)    | 3255(9)    | 3184(8)    |
| 801(7)   | 792(5)   | 802(5)   | 764(7)   | 3241(4)    | 3238(0)    | 3255(0)    | 3184(0)    |

**Table S25.** Harmonic vibrational frequencies (in  $\text{cm}^{-1}$ ) and infrared intensities (in parentheses, in  $\text{km/mol}$ ) for the structure **4S-2**

| M06-L    | B3LYP*   | B3LYP    | BP86     | M06-L      | B3LYP*     | B3LYP      | BP86       |
|----------|----------|----------|----------|------------|------------|------------|------------|
| 49(0)    | 49(0)    | 49(0)    | 47(0)    | 806(0)     | 799(4)     | 808(3)     | 775(6)     |
| 58(1)    | 52(1)    | 52(1)    | 51(1)    | 809(9)     | 800(1)     | 809(1)     | 776(1)     |
| 75(0)    | 78(0)    | 79(0)    | 76(0)    | 874(7)     | 889(4)     | 897(5)     | 860(3)     |
| 78(0)    | 83(0)    | 84(0)    | 77(0)    | 877(0)     | 891(0)     | 900(0)     | 863(0)     |
| 88(0)    | 87(0)    | 88(0)    | 83(0)    | 894(1)     | 903(0)     | 911(0)     | 873(0)     |
| 89(0)    | 87(0)    | 88(0)    | 86(0)    | 897(11)    | 906(18)    | 915(20)    | 875(15)    |
| 99(0)    | 91(0)    | 94(0)    | 86(0)    | 916(21)    | 916(36)    | 926(36)    | 884(34)    |
| 107(0)   | 113(0)   | 106(0)   | 119(1)   | 934(3)     | 933(4)     | 941(3)     | 903(6)     |
| 117(1)   | 121(1)   | 123(1)   | 128(0)   | 953(0)     | 954(0)     | 962(0)     | 925(0)     |
| 126(0)   | 131(0)   | 132(0)   | 129(0)   | 958(0)     | 957(0)     | 966(0)     | 929(0)     |
| 158(0)   | 159(0)   | 160(0)   | 154(1)   | 1006(6)    | 991(0)     | 999(0)     | 968(1)     |
| 214(0)   | 209(0)   | 208(0)   | 212(0)   | 1009(0)    | 995(0)     | 1003(0)    | 971(0)     |
| 231(0)   | 236(0)   | 237(0)   | 233(0)   | 1040(0)    | 1035(0)    | 1043(0)    | 1008(0)    |
| 244(0)   | 241(0)   | 238(0)   | 247(0)   | 1043(1)    | 1038(0)    | 1046(0)    | 1011(0)    |
| 336(8)   | 301(13)  | 305(15)  | 295(9)   | 1045(1)    | 1039(1)    | 1048(1)    | 1012(0)    |
| 346(0)   | 308(0)   | 309(0)   | 306(2)   | 1049(0)    | 1041(0)    | 1049(0)    | 1015(0)    |
| 351(4)   | 312(4)   | 314(4)   | 309(0)   | 1373(3)    | 1372(0)    | 1380(0)    | 1341(5)    |
| 355(2)   | 318(6)   | 321(5)   | 313(6)   | 1375(0)    | 1372(1)    | 1381(2)    | 1342(0)    |
| 382(0)   | 373(0)   | 373(0)   | 373(0)   | 1376(0)    | 1373(3)    | 1383(3)    | 1343(0)    |
| 394(1)   | 382(0)   | 385(1)   | 374(0)   | 1377(0)    | 1375(0)    | 1385(0)    | 1343(0)    |
| 397(1)   | 394(0)   | 392(1)   | 390(3)   | 1496(1)    | 1499(0)    | 1511(0)    | 1460(0)    |
| 399(0)   | 395(1)   | 396(0)   | 393(0)   | 1497(1)    | 1499(50)   | 1511(50)   | 1461(46)   |
| 423(2)   | 425(1)   | 425(1)   | 413(2)   | 1498(0)    | 1504(3)    | 1517(4)    | 1465(2)    |
| 424(0)   | 427(1)   | 430(0)   | 416(1)   | 1498(42)   | 1506(6)    | 1518(7)    | 1466(5)    |
| 425(5)   | 431(3)   | 433(5)   | 417(0)   | 1503(2)    | 1507(0)    | 1521(0)    | 1466(0)    |
| 435(3)   | 431(0)   | 435(0)   | 429(3)   | 1507(5)    | 1512(3)    | 1525(3)    | 1471(2)    |
| 436(0)   | 437(3)   | 439(3)   | 431(0)   | 1905(875)  | 1873(911)  | 1886(985)  | 1823(751)  |
| 468(14)  | 471(3)   | 467(5)   | 470(12)  | 1946(57)   | 1924(26)   | 1944(23)   | 1860(32)   |
| 472(6)   | 473(17)  | 474(19)  | 479(0)   | 2069(168)  | 2058(160)  | 2080(153)  | 1987(176)  |
| 475(31)  | 482(33)  | 475(30)  | 492(18)  | 2104(1219) | 2088(1225) | 2111(1281) | 2017(1047) |
| 501(5)   | 494(2)   | 494(4)   | 505(15)  | 3119(1)    | 3129(2)    | 3147(2)    | 3073(2)    |
| 515(15)  | 507(7)   | 506(7)   | 510(4)   | 3121(25)   | 3131(5)    | 3150(5)    | 3076(6)    |
| 528(0)   | 521(0)   | 520(0)   | 523(0)   | 3132(0)    | 3134(5)    | 3152(6)    | 3080(0)    |
| 540(35)  | 542(46)  | 541(46)  | 543(41)  | 3133(34)   | 3134(0)    | 3152(0)    | 3080(6)    |
| 551(49)  | 544(45)  | 544(46)  | 544(40)  | 3134(37)   | 3139(3)    | 3158(4)    | 3084(4)    |
| 620(490) | 615(531) | 612(542) | 620(481) | 3134(1)    | 3139(0)    | 3158(0)    | 3084(0)    |
| 742(0)   | 737(0)   | 745(0)   | 712(0)   | 3225(0)    | 3228(0)    | 3246(0)    | 3175(0)    |
| 744(1)   | 738(1)   | 746(1)   | 714(1)   | 3228(16)   | 3231(3)    | 3249(3)    | 3177(4)    |
| 790(17)  | 766(18)  | 772(20)  | 747(15)  | 3240(9)    | 3236(0)    | 3253(0)    | 3182(0)    |
| 796(3)   | 773(1)   | 780(1)   | 754(2)   | 3241(16)   | 3236(2)    | 3254(3)    | 3182(1)    |
| 797(0)   | 785(0)   | 795(0)   | 755(0)   | 3241(0)    | 3238(3)    | 3255(4)    | 3184(3)    |
| 804(15)  | 797(7)   | 807(6)   | 768(9)   | 3241(4)    | 3238(4)    | 3255(5)    | 3184(4)    |



**Table S26.** Harmonic vibrational frequencies (in  $\text{cm}^{-1}$ ) and infrared intensities (in parentheses, in  $\text{km/mol}$ ) for the structure **4S-3**

| M06-L    | B3LYP*   | B3LYP    | BP86    | M06-L     | B3LYP*     | B3LYP      | BP86      |
|----------|----------|----------|---------|-----------|------------|------------|-----------|
| 28(0)    | 17(0)    | 11(0)    | 22(1)   | 815(20)   | 804(13)    | 812(13)    | 778(11)   |
| 49(0)    | 50(0)    | 50(0)    | 44(0)   | 820(0)    | 809(0)     | 817(0)     | 782(0)    |
| 70(0)    | 71(0)    | 72(0)    | 67(0)   | 878(11)   | 888(15)    | 896(17)    | 863(11)   |
| 74(0)    | 72(0)    | 73(0)    | 71(0)   | 879(1)    | 888(1)     | 896(1)     | 863(1)    |
| 83(0)    | 79(0)    | 79(0)    | 79(0)   | 903(3)    | 912(3)     | 920(4)     | 884(2)    |
| 90(0)    | 89(0)    | 90(0)    | 87(0)   | 904(1)    | 913(4)     | 921(3)     | 885(5)    |
| 93(0)    | 91(0)    | 92(0)    | 89(0)   | 932(0)    | 931(0)     | 939(1)     | 903(0)    |
| 106(0)   | 98(0)    | 100(0)   | 94(0)   | 934(12)   | 932(23)    | 940(23)    | 904(21)   |
| 117(1)   | 118(0)   | 119(0)   | 113(0)  | 954(0)    | 953(0)     | 962(0)     | 925(0)    |
| 118(0)   | 122(1)   | 123(1)   | 119(1)  | 954(0)    | 953(0)     | 962(0)     | 925(0)    |
| 128(5)   | 129(4)   | 130(0)   | 127(3)  | 1006(15)  | 991(8)     | 999(9)     | 968(7)    |
| 145(0)   | 131(0)   | 131(5)   | 129(0)  | 1008(0)   | 993(0)     | 1000(0)    | 969(0)    |
| 153(1)   | 144(1)   | 145(1)   | 140(1)  | 1042(2)   | 1035(0)    | 1043(0)    | 1008(1)   |
| 170(0)   | 162(0)   | 164(0)   | 158(0)  | 1042(0)   | 1035(1)    | 1043(1)    | 1009(0)   |
| 351(5)   | 315(8)   | 316(10)  | 315(5)  | 1043(0)   | 1036(1)    | 1045(1)    | 1009(0)   |
| 357(1)   | 324(3)   | 326(4)   | 320(1)  | 1043(2)   | 1036(0)    | 1045(0)    | 1009(1)   |
| 364(1)   | 324(1)   | 326(1)   | 320(4)  | 1373(1)   | 1371(0)    | 1380(0)    | 1340(1)   |
| 366(0)   | 326(1)   | 328(0)   | 323(0)  | 1374(0)   | 1371(0)    | 1380(0)    | 1340(0)   |
| 385(0)   | 369(0)   | 371(0)   | 364(0)  | 1377(7)   | 1373(12)   | 1383(11)   | 1342(12)  |
| 389(3)   | 375(5)   | 377(5)   | 368(8)  | 1378(0)   | 1375(0)    | 1384(0)    | 1344(0)   |
| 398(2)   | 398(1)   | 397(1)   | 393(1)  | 1496(0)   | 1501(5)    | 1514(6)    | 1462(6)   |
| 417(2)   | 417(1)   | 419(2)   | 407(0)  | 1496(3)   | 1501(8)    | 1514(7)    | 1462(3)   |
| 422(9)   | 424(6)   | 426(6)   | 412(7)  | 1502(0)   | 1504(14)   | 1516(14)   | 1464(17)  |
| 423(1)   | 425(0)   | 427(0)   | 413(0)  | 1502(8)   | 1504(8)    | 1517(7)    | 1465(7)   |
| 448(0)   | 444(0)   | 445(0)   | 436(0)  | 1505(15)  | 1509(3)    | 1522(2)    | 1468(2)   |
| 459(8)   | 457(10)  | 457(8)   | 454(12) | 1506(5)   | 1509(0)    | 1522(0)    | 1468(1)   |
| 463(1)   | 462(1)   | 463(1)   | 458(1)  | 2038(152) | 2028(176)  | 2051(195)  | 1959(119) |
| 475(2)   | 467(4)   | 467(6)   | 462(2)  | 2050(999) | 2038(1085) | 2057(1094) | 1968(940) |
| 485(48)  | 488(85)  | 480(90)  | 504(80) | 2055(997) | 2039(1043) | 2061(1186) | 1978(882) |
| 495(7)   | 502(2)   | 496(2)   | 513(0)  | 2094(261) | 2077(191)  | 2097(142)  | 2011(194) |
| 519(6)   | 530(1)   | 524(1)   | 535(95) | 3125(10)  | 3134(1)    | 3152(6)    | 3080(0)   |
| 524(41)  | 532(41)  | 527(42)  | 540(4)  | 3125(22)  | 3134(6)    | 3152(2)    | 3080(9)   |
| 541(153) | 534(134) | 533(145) | 543(6)  | 3136(37)  | 3137(1)    | 3155(1)    | 3082(0)   |
| 550(0)   | 540(1)   | 538(0)   | 544(30) | 3136(3)   | 3137(6)    | 3155(6)    | 3082(9)   |
| 564(56)  | 555(0)   | 553(0)   | 559(1)  | 3139(13)  | 3142(4)    | 3161(5)    | 3086(5)   |
| 564(1)   | 562(61)  | 561(64)  | 563(48) | 3140(30)  | 3143(4)    | 3161(4)    | 3086(3)   |
| 745(3)   | 739(0)   | 746(0)   | 718(1)  | 3228(10)  | 3231(1)    | 3248(1)    | 3180(3)   |
| 745(0)   | 739(1)   | 746(1)   | 718(0)  | 3229(10)  | 3232(4)    | 3248(4)    | 3180(0)   |
| 793(19)  | 772(0)   | 778(0)   | 755(0)  | 3241(2)   | 3235(7)    | 3253(8)    | 3182(8)   |
| 796(1)   | 773(24)  | 778(29)  | 757(16) | 3241(18)  | 3235(0)    | 3253(0)    | 3182(2)   |
| 798(2)   | 789(17)  | 798(18)  | 763(18) | 3251(7)   | 3245(4)    | 3262(5)    | 3188(3)   |
| 798(21)  | 794(1)   | 803(1)   | 768(2)  | 3251(1)   | 3245(1)    | 3262(1)    | 3188(1)   |

**Table S27.** Harmonic vibrational frequencies (in  $\text{cm}^{-1}$ ) and infrared intensities (in parentheses, in  $\text{km/mol}$ ) for the structure **5S**

| M06-L    | B3LYP*  | B3LYP   | BP86     | M06-L      | B3LYP*     | B3LYP      | BP86      |
|----------|---------|---------|----------|------------|------------|------------|-----------|
| 26(0)    | 22(0)   | 25(0)   | 20(0)    | 795(12)    | 780(4)     | 781(3)     | 764(8)    |
| 56(0)    | 46(1)   | 36(3)   | 52(0)    | 799(18)    | 796(14)    | 802(15)    | 773(1)    |
| 58(0)    | 56(0)   | 56(0)   | 59(1)    | 809(67)    | 811(3)     | 818(4)     | 775(10)   |
| 64(1)    | 64(1)   | 61(1)   | 72(3)    | 813(4)     | 817(8)     | 824(10)    | 784(4)    |
| 77(0)    | 79(0)   | 78(0)   | 75(0)    | 824(9)     | 861(75)    | 870(69)    | 830(66)   |
| 80(0)    | 81(0)   | 83(0)   | 79(0)    | 895(6)     | 878(2)     | 882(7)     | 859(1)    |
| 87(0)    | 83(0)   | 84(0)   | 82(0)    | 897(2)     | 910(6)     | 917(7)     | 872(4)    |
| 96(0)    | 89(0)   | 87(0)   | 90(0)    | 924(4)     | 936(5)     | 941(6)     | 900(7)    |
| 100(1)   | 97(1)   | 96(1)   | 93(1)    | 940(5)     | 941(11)    | 948(11)    | 907(11)   |
| 103(0)   | 103(0)  | 105(0)  | 99(0)    | 957(0)     | 955(0)     | 962(0)     | 926(0)    |
| 113(0)   | 114(0)  | 113(0)  | 109(0)   | 958(1)     | 957(0)     | 965(0)     | 926(0)    |
| 120(0)   | 123(2)  | 121(4)  | 129(0)   | 1000(9)    | 1000(1)    | 1009(3)    | 976(1)    |
| 132(1)   | 127(3)  | 125(0)  | 141(0)   | 1013(9)    | 1002(4)    | 1011(4)    | 977(2)    |
| 134(4)   | 132(3)  | 129(3)  | 155(0)   | 1031(30)   | 1039(0)    | 1047(0)    | 1007(17)  |
| 153(0)   | 150(1)  | 146(1)  | 186(9)   | 1045(1)    | 1040(1)    | 1048(1)    | 1010(0)   |
| 163(0)   | 155(0)  | 156(0)  | 200(0)   | 1047(0)    | 1045(36)   | 1054(39)   | 1012(0)   |
| 199(0)   | 194(0)  | 185(0)  | 253(1)   | 1048(10)   | 1060(10)   | 1074(10)   | 1028(19)  |
| 326(3)   | 319(10) | 324(11) | 299(5)   | 1094(5)    | 1092(4)    | 1103(5)    | 1064(3)   |
| 352(7)   | 324(1)  | 326(0)  | 303(8)   | 1308(1)    | 1289(1)    | 1296(1)    | 1258(1)   |
| 361(2)   | 330(3)  | 331(3)  | 320(4)   | 1377(3)    | 1373(5)    | 1381(5)    | 1342(1)   |
| 365(1)   | 358(3)  | 359(4)  | 343(1)   | 1378(2)    | 1376(1)    | 1385(0)    | 1345(3)   |
| 374(12)  | 375(15) | 377(11) | 361(8)   | 1410(1)    | 1416(2)    | 1428(2)    | 1378(3)   |
| 391(1)   | 381(2)  | 387(6)  | 380(4)   | 1442(2)    | 1446(2)    | 1459(2)    | 1401(2)   |
| 404(6)   | 408(10) | 405(17) | 394(3)   | 1466(1)    | 1468(1)    | 1481(1)    | 1423(2)   |
| 410(6)   | 411(4)  | 413(3)  | 414(3)   | 1496(8)    | 1500(18)   | 1513(17)   | 1462(20)  |
| 429(12)  | 431(4)  | 433(1)  | 416(1)   | 1503(9)    | 1506(9)    | 1518(10)   | 1468(5)   |
| 433(1)   | 433(5)  | 436(8)  | 420(3)   | 1504(6)    | 1510(1)    | 1523(1)    | 1471(0)   |
| 440(9)   | 442(16) | 443(21) | 423(2)   | 1685(48)   | 1673(51)   | 1687(60)   | 1640(44)  |
| 445(3)   | 446(4)  | 450(2)  | 440(6)   | 1961(560)  | 1935(561)  | 1978(636)  | 1830(526) |
| 451(7)   | 451(9)  | 454(6)  | 446(1)   | 2059(216)  | 2048(219)  | 2069(241)  | 1896(196) |
| 464(31)  | 463(34) | 461(49) | 449(13)  | 2073(139)  | 2061(227)  | 2082(127)  | 1991(694) |
| 475(12)  | 475(21) | 478(21) | 468(7)   | 2082(1219) | 2069(1151) | 2091(1278) | 2010(629) |
| 483(7)   | 485(16) | 484(8)  | 483(14)  | 2122(639)  | 2106(672)  | 2128(701)  | 2032(412) |
| 488(8)   | 491(5)  | 490(5)  | 490(6)   | 3066(27)   | 3065(15)   | 3083(18)   | 3008(12)  |
| 502(12)  | 513(52) | 510(13) | 496(13)  | 3072(27)   | 3069(8)    | 3086(8)    | 3017(9)   |
| 505(22)  | 514(10) | 517(67) | 509(8)   | 3135(20)   | 3126(5)    | 3144(5)    | 3071(6)   |
| 534(17)  | 534(18) | 535(76) | 526(58)  | 3137(11)   | 3137(1)    | 3156(1)    | 3078(2)   |
| 541(159) | 535(86) | 538(21) | 530(52)  | 3138(35)   | 3139(4)    | 3157(6)    | 3081(2)   |
| 543(36)  | 545(35) | 546(45) | 542(62)  | 3138(6)    | 3141(6)    | 3158(5)    | 3084(6)   |
| 550(44)  | 552(76) | 554(76) | 553(12)  | 3154(13)   | 3143(1)    | 3161(9)    | 3085(1)   |
| 570(77)  | 577(76) | 576(62) | 585(19)  | 3161(16)   | 3146(8)    | 3162(2)    | 3100(5)   |
| 608(13)  | 606(20) | 611(25) | 604(336) | 3236(19)   | 3220(8)    | 3237(8)    | 3166(7)   |
| 660(1)   | 651(1)  | 657(0)  | 625(11)  | 3244(9)    | 3237(1)    | 3254(1)    | 3180(1)   |
| 765(0)   | 762(0)  | 768(0)  | 727(0)   | 3246(3)    | 3243(2)    | 3261(2)    | 3184(0)   |
| 776(6)   | 775(15) | 780(19) | 754(12)  | 3249(3)    | 3246(1)    | 3266(1)    | 3186(2)   |

**Table S28.** Harmonic vibrational frequencies (in  $\text{cm}^{-1}$ ) and infrared intensities (in parentheses, in  $\text{km/mol}$ ) for the structure **6S**

| M06-L    | B3LYP*   | B3LYP    | BP86     | M06-L      | B3LYP*     | B3LYP      | BP86      |
|----------|----------|----------|----------|------------|------------|------------|-----------|
| 29(0)    | 27(0)    | 28(0)    | 27(0)    | 655(0)     | 645(0)     | 651(0)     | 625(0)    |
| 37(0)    | 38(0)    | 39(0)    | 35(0)    | 655(1)     | 645(1)     | 651(0)     | 625(1)    |
| 53(0)    | 52(0)    | 53(0)    | 48(0)    | 758(4)     | 766(6)     | 771(8)     | 747(2)    |
| 62(0)    | 59(2)    | 60(2)    | 57(1)    | 759(3)     | 766(2)     | 772(3)     | 747(1)    |
| 64(1)    | 61(0)    | 61(0)    | 61(0)    | 789(9)     | 793(13)    | 797(15)    | 775(8)    |
| 68(0)    | 64(0)    | 64(0)    | 62(0)    | 790(3)     | 795(6)     | 799(7)     | 777(3)    |
| 75(0)    | 69(0)    | 70(0)    | 67(1)    | 828(137)   | 868(61)    | 872(41)    | 835(164)  |
| 82(0)    | 81(0)    | 81(0)    | 82(0)    | 828(9)     | 868(2)     | 873(2)     | 835(3)    |
| 87(0)    | 86(0)    | 86(0)    | 84(0)    | 892(1)     | 882(0)     | 891(1)     | 860(0)    |
| 89(0)    | 86(0)    | 87(0)    | 85(0)    | 892(2)     | 882(98)    | 891(115)   | 861(1)    |
| 98(0)    | 92(1)    | 92(1)    | 91(0)    | 955(0)     | 953(0)     | 960(0)     | 928(1)    |
| 99(0)    | 101(0)   | 102(0)   | 97(0)    | 955(0)     | 953(0)     | 961(0)     | 929(0)    |
| 103(1)   | 106(1)   | 109(1)   | 99(0)    | 998(32)    | 997(3)     | 1007(3)    | 969(6)    |
| 112(0)   | 109(0)   | 110(0)   | 105(0)   | 999(0)     | 998(0)     | 1009(1)    | 970(0)    |
| 118(0)   | 115(0)   | 118(0)   | 109(0)   | 1015(79)   | 1040(103)  | 1051(102)  | 1004(97)  |
| 118(0)   | 118(0)   | 118(1)   | 114(0)   | 1017(3)    | 1042(1)    | 1053(1)    | 1008(1)   |
| 125(2)   | 126(2)   | 128(2)   | 120(2)   | 1049(37)   | 1068(27)   | 1079(32)   | 1032(21)  |
| 140(0)   | 135(0)   | 137(0)   | 131(0)   | 1052(6)    | 1071(7)    | 1083(9)    | 1035(3)   |
| 151(0)   | 151(2)   | 153(2)   | 145(0)   | 1088(4)    | 1090(2)    | 1102(2)    | 1055(2)   |
| 151(1)   | 151(0)   | 154(0)   | 145(1)   | 1088(1)    | 1090(1)    | 1102(1)    | 1056(0)   |
| 316(3)   | 314(2)   | 317(2)   | 305(2)   | 1303(0)    | 1284(0)    | 1291(0)    | 1259(0)   |
| 319(0)   | 317(0)   | 320(0)   | 308(0)   | 1304(0)    | 1284(1)    | 1292(0)    | 1259(1)   |
| 355(3)   | 350(4)   | 352(6)   | 342(1)   | 1410(2)    | 1416(3)    | 1428(3)    | 1379(5)   |
| 357(0)   | 353(0)   | 355(0)   | 344(0)   | 1410(1)    | 1417(2)    | 1428(2)    | 1379(3)   |
| 392(42)  | 395(41)  | 393(70)  | 390(0)   | 1440(2)    | 1446(2)    | 1458(2)    | 1406(3)   |
| 394(1)   | 397(0)   | 398(0)   | 391(13)  | 1441(1)    | 1446(3)    | 1458(2)    | 1406(2)   |
| 409(29)  | 414(60)  | 409(30)  | 416(0)   | 1464(1)    | 1467(1)    | 1479(1)    | 1429(1)   |
| 418(1)   | 425(1)   | 420(4)   | 418(4)   | 1464(1)    | 1467(1)    | 1479(1)    | 1429(1)   |
| 427(2)   | 427(1)   | 428(0)   | 424(62)  | 1687(41)   | 1677(40)   | 1691(44)   | 1630(26)  |
| 427(0)   | 429(1)   | 429(4)   | 436(1)   | 1687(26)   | 1677(36)   | 1691(44)   | 1630(13)  |
| 440(23)  | 440(18)  | 441(25)  | 441(1)   | 2054(103)  | 2043(138)  | 2066(137)  | 1971(147) |
| 442(0)   | 449(0)   | 451(0)   | 443(1)   | 2069(888)  | 2053(802)  | 2072(722)  | 1986(804) |
| 458(2)   | 457(0)   | 458(1)   | 447(6)   | 2079(32)   | 2064(278)  | 2086(471)  | 1999(180) |
| 460(1)   | 459(2)   | 460(1)   | 450(2)   | 2087(975)  | 2073(941)  | 2096(954)  | 2001(863) |
| 466(0)   | 465(1)   | 467(2)   | 458(1)   | 2091(1161) | 2075(1090) | 2097(1084) | 2005(901) |
| 476(15)  | 481(15)  | 484(9)   | 468(19)  | 2139(421)  | 2122(385)  | 2144(414)  | 2053(317) |
| 491(5)   | 490(6)   | 491(6)   | 497(13)  | 3069(18)   | 3069(8)    | 3085(11)   | 3018(6)   |
| 493(13)  | 491(10)  | 493(12)  | 499(2)   | 3070(23)   | 3069(16)   | 3085(18)   | 3018(15)  |
| 500(25)  | 521(16)  | 520(23)  | 519(4)   | 3076(29)   | 3073(0)    | 3089(0)    | 3022(0)   |
| 504(27)  | 522(14)  | 521(23)  | 520(7)   | 3076(19)   | 3073(11)   | 3089(12)   | 3023(10)  |
| 535(13)  | 539(20)  | 538(15)  | 536(189) | 3140(28)   | 3128(5)    | 3145(5)    | 3075(8)   |
| 536(72)  | 540(129) | 539(101) | 540(44)  | 3140(17)   | 3128(2)    | 3146(3)    | 3075(3)   |
| 551(249) | 548(231) | 549(279) | 542(18)  | 3151(9)    | 3142(5)    | 3157(6)    | 3096(4)   |
| 554(55)  | 553(39)  | 557(36)  | 548(92)  | 3152(13)   | 3142(4)    | 3157(4)    | 3096(4)   |
| 557(37)  | 559(47)  | 561(35)  | 552(75)  | 3162(0)    | 3145(0)    | 3160(0)    | 3099(0)   |
| 576(20)  | 573(35)  | 574(37)  | 568(37)  | 3162(29)   | 3145(13)   | 3160(15)   | 3099(11)  |
| 606(25)  | 604(40)  | 608(43)  | 590(28)  | 3238(18)   | 3222(7)    | 3239(7)    | 3170(7)   |
| 611(8)   | 610(12)  | 614(12)  | 593(11)  | 3238(13)   | 3222(5)    | 3239(5)    | 3170(5)   |
